# Supplementary material for: Intensive sea urchin harvest rescales Paracentrotus lividus population structure and threatens self-sustenance
Source: PeerJ. 2023 Nov 20;11:e16220. doi: 10.7717/peerj.16220 (PMC10666612; doi:10.7717/peerj.16220)
Supplement: Supplemental Information 8 [file peerj-11-16220-s008.xlsx]

## Sheet: GSI
pSampling period	Replicate	Year	Month	Locality	SST	SWH	Site	Size	TD	wweicght	gweight	GSI
1	1	2013	June	H	19.69	1.08	A	g	51	50.9	0.9	1.76817
1	2	2013	June	H	19.69	1.08	A	g	50	57.03	2.9	5.08504
1	3	2013	June	H	19.69	1.08	A	g	53	60.51	1.45	2.3963
1	4	2013	June	H	19.69	1.08	A	g	52	63.92	1.16	1.81477
1	5	2013	June	H	19.69	1.08	A	g	55	64.23	3.28	5.10665
1	6	2013	June	H	19.69	1.08	A	g	53	57.67	2.24	3.88417
1	7	2013	June	H	19.69	1.08	A	g	57	77.04	1.7	2.20665
1	8	2013	June	H	19.69	1.08	A	g	55	63.61	1.2	1.8865
1	9	2013	June	H	19.69	1.08	A	g	54	71.65	1.57	2.19121
1	10	2013	June	H	19.69	1.08	A	g	52	62.04	0.72	1.16054
1	11	2013	June	H	19.69	1.08	A	g	55	66.42	1.35	2.03252
1	12	2013	June	H	19.69	1.08	A	g	56	65.35	0.73	1.11706
1	13	2013	June	H	19.69	1.08	A	g	55	64.55	1.15	1.78156
1	14	2013	June	H	19.69	1.08	A	g	53	56.97	1.11	1.94839
1	15	2013	June	H	19.69	1.08	A	g	52	62.32	1.16	1.86136
1	16	2013	June	H	19.69	1.08	A	g	54	63.9	1.83	2.86385
1	17	2013	June	H	19.69	1.08	A	g	52	53.38	1.53	2.86624
1	18	2013	June	H	19.69	1.08	A	g	52	56.07	0.46	0.820403
1	19	2013	June	H	19.69	1.08	A	g	55	66.84	1.46	2.18432
1	20	2013	June	H	19.69	1.08	A	g	53	61.37	1.01	1.64576
1	21	2013	June	H	19.69	1.08	A	m	44	41.37	0.65	1.57119
1	22	2013	June	H	19.69	1.08	A	m	45	43.69	0.76	1.73953
1	23	2013	June	H	19.69	1.08	A	m	42	30.25	0.32	1.05785
1	24	2013	June	H	19.69	1.08	A	m	45	43.72	0.34	0.777676
1	25	2013	June	H	19.69	1.08	A	m	41	32.73	0.25	0.763825
1	26	2013	June	H	19.69	1.08	A	m	47	48.49	0.52	1.07239
1	27	2013	June	H	19.69	1.08	A	m	46	42.26	0.7	1.65641
1	28	2013	June	H	19.69	1.08	A	m	45	34.39	0.41	1.19221
1	29	2013	June	H	19.69	1.08	A	m	42	32.68	0.73	2.23378
1	30	2013	June	H	19.69	1.08	B	g	55	73.03	1.63	2.23196
1	31	2013	June	H	19.69	1.08	B	g	56	68.04	1.76	2.58671
1	32	2013	June	H	19.69	1.08	B	g	60	96.09	2.53	2.63295
1	33	2013	June	H	19.69	1.08	B	g	62	90.46	1.7	1.87928
1	34	2013	June	H	19.69	1.08	B	g	60	90.92	1.18	1.29784
1	35	2013	June	H	19.69	1.08	B	g	55	62.23	2	3.21388
1	36	2013	June	H	19.69	1.08	B	g	54	61.44	0.97	1.57878
1	37	2013	June	H	19.69	1.08	B	g	56	61.97	1.49	2.40439
1	38	2013	June	H	19.69	1.08	B	g	51	60.48	1.17	1.93452
1	39	2013	June	H	19.69	1.08	B	g	52	58.61	0.94	1.60382
1	40	2013	June	H	19.69	1.08	B	g	58	74.86	1.63	2.1774
1	41	2013	June	H	19.69	1.08	B	g	55	69.13	1.46	2.11196
1	42	2013	June	H	19.69	1.08	B	g	53	61.76	0.91	1.47345
1	43	2013	June	H	19.69	1.08	B	g	54	60.02	0.86	1.43286
1	44	2013	June	H	19.69	1.08	B	g	54	57.73	0.27	0.467694
1	45	2013	June	H	19.69	1.08	B	g	51	58.6	1.12	1.91126
1	46	2013	June	H	19.69	1.08	B	g	51	55.28	0.54	0.976845
1	47	2013	June	H	19.69	1.08	B	g	54	72.88	1.5	2.05818
1	48	2013	June	H	19.69	1.08	B	g	58	83.51	2.24	2.68231
1	49	2013	June	H	19.69	1.08	B	g	51	60.42	1.39	2.30056
1	50	2013	June	H	19.69	1.08	B	m	42	35.24	0.27	0.766175
1	51	2013	June	H	19.69	1.08	B	m	44	33.12	0.33	0.996377
1	52	2013	June	H	19.69	1.08	B	m	41	28.73	1.81	6.30003
1	53	2013	June	H	19.69	1.08	B	m	43	32.57	0.15	0.460547
1	54	2013	June	H	19.69	1.08	B	m	44	31.23	0.24	0.768492
1	55	2013	June	H	19.69	1.08	B	m	43	40.37	0.39	0.966064
1	56	2013	June	H	19.69	1.08	B	m	49	49.21	0.55	1.11766
1	57	2013	June	H	19.69	1.08	B	m	45	35.58	0.26	0.730748
1	58	2013	June	H	19.69	1.08	B	m	44	33.84	0.52	1.53664
1	59	2013	June	H	19.69	1.08	B	m	48	44.93	0.86	1.91409
1	60	2013	June	H	19.69	1.08	B	m	45	36.67	0.58	1.58167
1	1	2013	July	H	23.46	0.42	A	g	52	58.4	1.73	2.96233
1	2	2013	July	H	23.46	0.42	A	g	53	58.32	0.98	1.68038
1	3	2013	July	H	23.46	0.42	A	g	54	57.32	1.7	2.96581
1	4	2013	July	H	23.46	0.42	A	g	52	51.25	0.89	1.73659
1	5	2013	July	H	23.46	0.42	A	g	54	70.5	0.76	1.07801
1	6	2013	July	H	23.46	0.42	A	g	55	62.69	1.38	2.20131
1	7	2013	July	H	23.46	0.42	A	g	50	61.38	1.52	2.47638
1	8	2013	July	H	23.46	0.42	A	g	51	61.11	1.72	2.8146
1	9	2013	July	H	23.46	0.42	A	g	52	51.5	0.79	1.53398
1	10	2013	July	H	23.46	0.42	A	g	51	44.72	0.39	0.872093
1	11	2013	July	H	23.46	0.42	A	g	52	57.11	1.8	3.15181
1	12	2013	July	H	23.46	0.42	A	g	58	67.43	2.07	3.06985
1	13	2013	July	H	23.46	0.42	A	g	55	70.45	2.21	3.13698
1	14	2013	July	H	23.46	0.42	A	g	55	66.45	1.59	2.39278
1	15	2013	July	H	23.46	0.42	A	g	51	61.79	1.19	1.92588
1	16	2013	July	H	23.46	0.42	A	g	56	69.51	2.02	2.90606
1	17	2013	July	H	23.46	0.42	A	g	56	67.74	1.2	1.77148
1	18	2013	July	H	23.46	0.42	A	g	54	66.81	0.69	1.03278
1	19	2013	July	H	23.46	0.42	A	g	55	68.81	1.45	2.10725
1	20	2013	July	H	23.46	0.42	A	g	58	82.07	1.98	2.41257
1	21	2013	July	H	23.46	0.42	A	m	47	42.03	0.73	1.73685
1	22	2013	July	H	23.46	0.42	A	m	44	35.84	0.89	2.48326
1	23	2013	July	H	23.46	0.42	A	m	47	39.68	0.94	2.36895
1	24	2013	July	H	23.46	0.42	A	m	43	39.94	0.62	1.55233
1	25	2013	July	H	23.46	0.42	A	m	43	30.98	0.38	1.2266
1	26	2013	July	H	23.46	0.42	A	m	46	40.32	0.82	2.03373
1	27	2013	July	H	23.46	0.42	A	m	45	36.33	0.38	1.04597
1	28	2013	July	H	23.46	0.42	A	m	48	45.53	0.68	1.49352
1	29	2013	July	H	23.46	0.42	A	m	45	48.28	0.53	1.09776
1	30	2013	July	H	23.46	0.42	A	m	48	50.93	1.22	2.39544
1	31	2013	July	H	23.46	0.42	B	g	55	68.79	2.16	3.13999
1	32	2013	July	H	23.46	0.42	B	g	57	79.25	1.09	1.37539
1	33	2013	July	H	23.46	0.42	B	g	53	65.72	2.87	4.36701
1	34	2013	July	H	23.46	0.42	B	g	54	78.66	1.81	2.30104
1	35	2013	July	H	23.46	0.42	B	g	52	66.1	1.78	2.69289
1	36	2013	July	H	23.46	0.42	B	g	53	78.45	0.93	1.18547
1	37	2013	July	H	23.46	0.42	B	g	50	60.84	1.35	2.21893
1	38	2013	July	H	23.46	0.42	B	g	51	62.16	1	1.60875
1	39	2013	July	H	23.46	0.42	B	g	54	70.08	1.95	2.78253
1	40	2013	July	H	23.46	0.42	B	g	50	60.98	1.79	2.93539
1	41	2013	July	H	23.46	0.42	B	g	53	59.85	2.33	3.89307
1	42	2013	July	H	23.46	0.42	B	g	55	77.74	1.63	2.09673
1	43	2013	July	H	23.46	0.42	B	g	54	62.63	1.14	1.82021
1	44	2013	July	H	23.46	0.42	B	g	55	65.09	1.8	2.7654
1	45	2013	July	H	23.46	0.42	B	g	55	61.26	1.99	3.24845
1	46	2013	July	H	23.46	0.42	B	g	53	57.13	2.12	3.71083
1	47	2013	July	H	23.46	0.42	B	g	53	67.67	1.07	1.5812
1	48	2013	July	H	23.46	0.42	B	g	54	69.76	2.28	3.26835
1	49	2013	July	H	23.46	0.42	B	g	53	64.8	1.46	2.25309
1	50	2013	July	H	23.46	0.42	B	g	51	60.04	1.33	2.21519
1	51	2013	July	H	23.46	0.42	B	m	40	26.39	0.86	3.25881
1	52	2013	July	H	23.46	0.42	B	m	45	41.39	0.87	2.10196
1	53	2013	July	H	23.46	0.42	B	m	42	28.71	0.5	1.74155
1	54	2013	July	H	23.46	0.42	B	m	40	27.86	0.24	0.86145
1	55	2013	July	H	23.46	0.42	B	m	40	31.24	0.27	0.864277
1	56	2013	July	H	23.46	0.42	B	m	49	54.17	1.11	2.0491
1	57	2013	July	H	23.46	0.42	B	m	49	51.7	1.15	2.22437
1	58	2013	July	H	23.46	0.42	B	m	49	49.38	0.57	1.15431
1	59	2013	July	H	23.46	0.42	B	m	44	35.42	0.76	2.14568
1	60	2013	July	H	23.46	0.42	B	m	46	39.17	0.56	1.42967
1	1	2013	August	H	24.59	0.68	A	g	56	68.65	1.1	1.60233
1	2	2013	August	H	24.59	0.68	A	g	55	67.31	0.8	1.18853
1	3	2013	August	H	24.59	0.68	A	g	57	71.17	1.16	1.6299
1	4	2013	August	H	24.59	0.68	A	g	57	69.54	1.17	1.68248
1	5	2013	August	H	24.59	0.68	A	g	54	59.34	0.84	1.41557
1	6	2013	August	H	24.59	0.68	A	g	55	62.42	1.19	1.90644
1	7	2013	August	H	24.59	0.68	A	g	54	62.05	0.47	0.757454
1	8	2013	August	H	24.59	0.68	A	g	54	69.76	1.45	2.07856
1	9	2013	August	H	24.59	0.68	A	g	54	74.13	0.98	1.322
1	10	2013	August	H	24.59	0.68	A	g	55	65.6	1.14	1.7378
1	11	2013	August	H	24.59	0.68	A	g	54	67.18	0.4	0.595415
1	12	2013	August	H	24.59	0.68	A	g	54	69.66	1.05	1.50732
1	13	2013	August	H	24.59	0.68	A	g	57	81.97	1.62	1.97633
1	14	2013	August	H	24.59	0.68	A	g	56	73.97	0.86	1.16263
1	15	2013	August	H	24.59	0.68	A	g	53	63.35	0.45	0.710339
1	16	2013	August	H	24.59	0.68	A	g	54	65.37	0.96	1.46856
1	17	2013	August	H	24.59	0.68	A	g	51	52.06	2.39	4.59086
1	18	2013	August	H	24.59	0.68	A	g	52	55.52	0.79	1.42291
1	19	2013	August	H	24.59	0.68	A	g	53	58.2	0.47	0.80756
1	20	2013	August	H	24.59	0.68	A	g	53	64.84	1.5	2.31339
1	21	2013	August	H	24.59	0.68	A	m	47	38.21	0.65	1.70113
1	22	2013	August	H	24.59	0.68	A	m	43	34.15	0.15	0.439239
1	23	2013	August	H	24.59	0.68	A	m	42	32.25	0.12	0.372093
1	24	2013	August	H	24.59	0.68	A	m	44	36.3	0.2	0.550964
1	25	2013	August	H	24.59	0.68	A	m	44	35.81	0.2	0.558503
1	26	2013	August	H	24.59	0.68	A	m	48	50.33	0.52	1.03318
1	27	2013	August	H	24.59	0.68	A	m	48	47.33	0.59	1.24657
1	28	2013	August	H	24.59	0.68	A	m	44	42.3	0.45	1.06383
1	29	2013	August	H	24.59	0.68	A	m	45	39.84	0.48	1.20482
1	30	2013	August	H	24.59	0.68	A	m	42	30.91	0.1	0.32352
1	31	2013	August	H	24.59	0.68	B	g	60	97.04	3.3	3.40066
1	32	2013	August	H	24.59	0.68	B	g	59	78.78	3.41	4.32851
1	33	2013	August	H	24.59	0.68	B	g	54	66.56	1.89	2.83954
1	34	2013	August	H	24.59	0.68	B	g	54	78.04	1.44	1.84521
1	35	2013	August	H	24.59	0.68	B	g	60	90.07	3.16	3.50838
1	36	2013	August	H	24.59	0.68	B	g	53	73.99	2.51	3.39235
1	37	2013	August	H	24.59	0.68	B	g	54	61.58	1.85	3.00422
1	38	2013	August	H	24.59	0.68	B	g	54	73.27	1.42	1.93804
1	39	2013	August	H	24.59	0.68	B	g	53	69.59	1.06	1.52321
1	40	2013	August	H	24.59	0.68	B	g	56	87.32	1.6	1.83234
1	41	2013	August	H	24.59	0.68	B	g	52	63.61	1.73	2.7197
1	42	2013	August	H	24.59	0.68	B	g	51	57.82	2	3.45901
1	43	2013	August	H	24.59	0.68	B	g	52	66.02	1.45	2.1963
1	44	2013	August	H	24.59	0.68	B	g	52	55.49	1.77	3.18976
1	45	2013	August	H	24.59	0.68	B	g	53	39.46	1.17	2.96503
1	46	2013	August	H	24.59	0.68	B	g	52	66.35	1.68	2.53203
1	47	2013	August	H	24.59	0.68	B	g	59	86.66	1.74	2.00785
1	48	2013	August	H	24.59	0.68	B	g	52	59.97	1.65	2.75138
1	49	2013	August	H	24.59	0.68	B	g	54	69.4	2.11	3.04035
1	50	2013	August	H	24.59	0.68	B	g	55	61.98	1.6	2.58148
1	51	2013	August	H	24.59	0.68	B	m	45	43.32	0.58	1.33887
1	52	2013	August	H	24.59	0.68	B	m	46	45.02	0.6	1.33274
1	53	2013	August	H	24.59	0.68	B	m	46	49.89	0.94	1.88415
1	54	2013	August	H	24.59	0.68	B	m	45	45.84	0.91	1.98517
1	55	2013	August	H	24.59	0.68	B	m	47	59.04	1.07	1.81233
1	56	2013	August	H	24.59	0.68	B	m	42	37.48	0.57	1.52081
1	57	2013	August	H	24.59	0.68	B	m	45	39.05	na	0
1	58	2013	August	H	24.59	0.68	B	m	45	41.22	0.96	2.32897
1	59	2013	August	H	24.59	0.68	B	m	44	43.47	0.34	0.782149
1	60	2013	August	H	24.59	0.68	B	m	47	43.43	0.57	1.31246
1	1	2013	September	H	23.32	0.86	A	g	57	65.15	1.81	2.7782
1	2	2013	September	H	23.32	0.86	A	g	57	74.53	1.51	2.02603
1	3	2013	September	H	23.32	0.86	A	g	55	63.02	1.62	2.57061
1	4	2013	September	H	23.32	0.86	A	g	57	67.06	1.89	2.81837
1	5	2013	September	H	23.32	0.86	A	g	57	66.85	1.4	2.09424
1	6	2013	September	H	23.32	0.86	A	g	52	51.7	1.09	2.10832
1	7	2013	September	H	23.32	0.86	A	g	54	61.3	1.35	2.20228
1	8	2013	September	H	23.32	0.86	A	g	53	55.07	1	1.81587
1	9	2013	September	H	23.32	0.86	A	g	53	58.68	1.6	2.72665
1	10	2013	September	H	23.32	0.86	A	g	53	55.4	0.98	1.76895
1	11	2013	September	H	23.32	0.86	A	g	57	68.41	1.84	2.68967
1	12	2013	September	H	23.32	0.86	A	g	57	67.14	2.26	3.3661
1	13	2013	September	H	23.32	0.86	A	g	56	71.32	2.04	2.86035
1	14	2013	September	H	23.32	0.86	A	g	55	47.33	1.34	2.83119
1	15	2013	September	H	23.32	0.86	A	g	60	83.63	0.84	1.00442
1	16	2013	September	H	23.32	0.86	A	g	60	65.65	1.02	1.55369
1	17	2013	September	H	23.32	0.86	A	g	56	72.39	2.32	3.20486
1	18	2013	September	H	23.32	0.86	A	g	55	65.73	2.1	3.19489
1	19	2013	September	H	23.32	0.86	A	g	56	70.33	1.4	1.99062
1	20	2013	September	H	23.32	0.86	A	g	51	47.44	0.86	1.81282
1	21	2013	September	H	23.32	0.86	A	m	46	40.78	0.5	1.22609
1	22	2013	September	H	23.32	0.86	A	m	46	46.34	0.46	0.992663
1	23	2013	September	H	23.32	0.86	A	m	45	29.79	1.93	6.47868
1	24	2013	September	H	23.32	0.86	A	m	49	49.77	0.9	1.80832
1	25	2013	September	H	23.32	0.86	A	m	49	49.32	1.86	3.77129
1	26	2013	September	H	23.32	0.86	A	m	45	36.04	0.42	1.16537
1	27	2013	September	H	23.32	0.86	A	m	42	27.42	0.21	0.765864
1	28	2013	September	H	23.32	0.86	A	m	45	36.64	0.39	1.06441
1	29	2013	September	H	23.32	0.86	A	m	46	37.91	1.08	2.84885
1	30	2013	September	H	23.32	0.86	A	m	46	38.55	0.85	2.20493
1	31	2013	September	H	23.32	0.86	B	g	53	61.49	3.12	5.074
1	32	2013	September	H	23.32	0.86	B	g	56	66.57	1.38	2.07301
1	33	2013	September	H	23.32	0.86	B	g	54	67.97	2.14	3.14845
1	34	2013	September	H	23.32	0.86	B	g	57	71.32	2.65	3.71565
1	35	2013	September	H	23.32	0.86	B	g	55	60.6	2.28	3.76238
1	36	2013	September	H	23.32	0.86	B	g	56	64.19	2.19	3.41175
1	37	2013	September	H	23.32	0.86	B	g	61	76.93	1.14	1.48187
1	38	2013	September	H	23.32	0.86	B	g	54	66.66	2.15	3.22532
1	39	2013	September	H	23.32	0.86	B	g	53	69.24	1.7	2.45523
1	40	2013	September	H	23.32	0.86	B	g	51	52.95	1.9	3.58829
1	41	2013	September	H	23.32	0.86	B	g	52	63.22	1.23	1.94559
1	42	2013	September	H	23.32	0.86	B	g	50	55.33	1.81	3.27128
1	43	2013	September	H	23.32	0.86	B	g	50	56.44	1.4	2.48051
1	44	2013	September	H	23.32	0.86	B	g	52	58.48	2.14	3.65937
1	45	2013	September	H	23.32	0.86	B	g	52	53.23	1.54	2.89311
1	46	2013	September	H	23.32	0.86	B	g	51	50.35	1.88	3.73386
1	47	2013	September	H	23.32	0.86	B	g	55	68.84	1.11	1.61243
1	48	2013	September	H	23.32	0.86	B	g	55	44.7	5.3	11.8568
1	49	2013	September	H	23.32	0.86	B	g	51	50.62	1.86	3.67444
1	50	2013	September	H	23.32	0.86	B	g	51	64.34	2.17	3.37271
1	51	2013	September	H	23.32	0.86	B	m	42	31.46	0.88	2.7972
1	52	2013	September	H	23.32	0.86	B	m	49	49.15	2.34	4.76094
1	53	2013	September	H	23.32	0.86	B	m	42	32.42	0.48	1.48057
1	54	2013	September	H	23.32	0.86	B	m	42	32.35	0.81	2.50386
1	55	2013	September	H	23.32	0.86	B	m	42	33.22	1.3	3.91331
1	56	2013	September	H	23.32	0.86	B	m	46	43.49	1.45	3.3341
1	57	2013	September	H	23.32	0.86	B	m	47	45.81	1.05	2.29208
1	58	2013	September	H	23.32	0.86	B	m	46	32.21	1.01	3.13567
1	59	2013	September	H	23.32	0.86	B	m	44	39.74	0.94	2.36537
1	60	2013	September	H	23.32	0.86	B	m	47	47.5	1.6	3.36842
1	1	2013	October	H	22.09	0.72	A	g	59	82.74	1.53	1.84917
1	2	2013	October	H	22.09	0.72	A	g	57	68.13	1.45	2.12828
1	3	2013	October	H	22.09	0.72	A	g	59	76.61	1.33	1.73607
1	4	2013	October	H	22.09	0.72	A	g	59	74.21	0.52	0.700714
1	5	2013	October	H	22.09	0.72	A	g	60	77.55	1.17	1.5087
1	6	2013	October	H	22.09	0.72	A	g	60	67.09	1.51	2.25071
1	7	2013	October	H	22.09	0.72	A	g	60	67.04	1.82	2.7148
1	8	2013	October	H	22.09	0.72	A	g	54	61.81	1.5	2.42679
1	9	2013	October	H	22.09	0.72	A	g	56	62.28	0.55	0.883109
1	10	2013	October	H	22.09	0.72	A	g	57	81.01	1.17	1.44427
1	11	2013	October	H	22.09	0.72	A	g	54	64.88	1.2	1.84957
1	12	2013	October	H	22.09	0.72	A	g	56	62.08	2.14	3.44716
1	13	2013	October	H	22.09	0.72	A	g	51	49.36	1.01	2.04619
1	14	2013	October	H	22.09	0.72	A	g	51	56	1.33	2.375
1	15	2013	October	H	22.09	0.72	A	g	54	63.46	1.07	1.6861
1	16	2013	October	H	22.09	0.72	A	g	52	58	0.51	0.87931
1	17	2013	October	H	22.09	0.72	A	g	53	64.33	1.73	2.68926
1	18	2013	October	H	22.09	0.72	A	g	57	74.17	2.04	2.75044
1	19	2013	October	H	22.09	0.72	A	g	58	65.58	1.02	1.55535
1	20	2013	October	H	22.09	0.72	A	m	43	31.32	0.71	2.26692
1	21	2013	October	H	22.09	0.72	A	m	46	39.85	0.7	1.75659
1	22	2013	October	H	22.09	0.72	A	m	48	41.46	0.7	1.68837
1	23	2013	October	H	22.09	0.72	A	m	49	49.15	1.48	3.01119
1	24	2013	October	H	22.09	0.72	A	m	48	40.58	0.27	0.665352
1	25	2013	October	H	22.09	0.72	A	m	49	46.38	0.7	1.50927
1	26	2013	October	H	22.09	0.72	A	m	46	36.32	0.36	0.991189
1	27	2013	October	H	22.09	0.72	A	m	49	47.29	0.53	1.12074
1	28	2013	October	H	22.09	0.72	A	m	48	43.41	1.22	2.81041
1	29	2013	October	H	22.09	0.72	A	m	45	42.19	1.19	2.82057
1	30	2013	October	H	22.09	0.72	B	g	58	69.87	2.14	3.06283
1	31	2013	October	H	22.09	0.72	B	g	56	76.09	2.86	3.75871
1	32	2013	October	H	22.09	0.72	B	g	53	65.02	1.5	2.30698
1	33	2013	October	H	22.09	0.72	B	g	52	70.83	1.66	2.34364
1	34	2013	October	H	22.09	0.72	B	g	52	65.01	1.92	2.95339
1	35	2013	October	H	22.09	0.72	B	g	51	65.3	2.17	3.32312
1	36	2013	October	H	22.09	0.72	B	g	54	67.2	2.58	3.83929
1	37	2013	October	H	22.09	0.72	B	g	56	70.82	3.06	4.32081
1	38	2013	October	H	22.09	0.72	B	g	51	61.15	1.7	2.78005
1	39	2013	October	H	22.09	0.72	B	g	53	70.44	1.7	2.4134
1	40	2013	October	H	22.09	0.72	B	g	54	77.46	2.54	3.27911
1	41	2013	October	H	22.09	0.72	B	g	51	59.88	2.56	4.27522
1	42	2013	October	H	22.09	0.72	B	g	60	91.57	2.2	2.40253
1	43	2013	October	H	22.09	0.72	B	g	53	70.23	0.73	1.03944
1	44	2013	October	H	22.09	0.72	B	g	54	70.23	3.17	4.51374
1	45	2013	October	H	22.09	0.72	B	g	56	76.26	1.51	1.98007
1	46	2013	October	H	22.09	0.72	B	g	52	71.29	1.76	2.46879
1	47	2013	October	H	22.09	0.72	B	g	53	62.08	1.59	2.56121
1	48	2013	October	H	22.09	0.72	B	g	51	56.7	3.06	5.39683
1	49	2013	October	H	22.09	0.72	B	g	55	72.82	1.66	2.27959
1	50	2013	October	H	22.09	0.72	B	g	54	65.44	1.58	2.41443
1	51	2013	October	H	22.09	0.72	B	m	49	44.38	1.57	3.53763
1	52	2013	October	H	22.09	0.72	B	m	47	32.65	0.98	3.00153
1	53	2013	October	H	22.09	0.72	B	m	47	38.09	1.02	2.67787
1	54	2013	October	H	22.09	0.72	B	m	49	48.87	1.29	2.63966
1	55	2013	October	H	22.09	0.72	B	m	43	39.39	1.07	2.71643
1	56	2013	October	H	22.09	0.72	B	m	42	37.03	0.59	1.5933
1	57	2013	October	H	22.09	0.72	B	m	49	45.91	0.75	1.63363
1	58	2013	October	H	22.09	0.72	B	m	47	50.06	1.48	2.95645
1	59	2013	October	H	22.09	0.72	B	m	46	42.02	0.33	0.78534
1	60	2013	October	H	22.09	0.72	B	m	46	27.9	0.35	1.25448
1	1	2013	December	H	15.34	1.07	A	g	54	61.33	2.4	3.91326
1	2	2013	December	H	15.34	1.07	A	g	55	65.21	2.98	4.56985
1	3	2013	December	H	15.34	1.07	A	g	57	66.46	3.16	4.75474
1	4	2013	December	H	15.34	1.07	A	g	50	53.74	1.83	3.40528
1	5	2013	December	H	15.34	1.07	A	g	54	53.26	1.82	3.4172
1	6	2013	December	H	15.34	1.07	A	g	54	57.99	1.54	2.65563
1	7	2013	December	H	15.34	1.07	A	g	53	62.91	2.15	3.41758
1	8	2013	December	H	15.34	1.07	A	g	61	62.18	0.77	1.23834
1	9	2013	December	H	15.34	1.07	A	g	61	73.89	3.11	4.20896
1	10	2013	December	H	15.34	1.07	A	g	55	68.13	2.89	4.24189
1	11	2013	December	H	15.34	1.07	A	g	54	69.24	2.25	3.24957
1	12	2013	December	H	15.34	1.07	A	g	54	61.39	1.59	2.59
1	13	2013	December	H	15.34	1.07	A	g	50	54.98	1.11	2.01892
1	14	2013	December	H	15.34	1.07	A	g	51	63.6	1.7	2.67296
1	15	2013	December	H	15.34	1.07	A	g	53	64.59	1.97	3.05001
1	16	2013	December	H	15.34	1.07	A	g	54	61.73	1.97	3.19132
1	17	2013	December	H	15.34	1.07	A	g	54	58.01	1.95	3.36149
1	18	2013	December	H	15.34	1.07	A	g	54	60.01	2.18	3.63273
1	19	2013	December	H	15.34	1.07	A	g	52	64.64	1.42	2.19678
1	20	2013	December	H	15.34	1.07	A	g	50	48.5	1.21	2.49485
1	21	2013	December	H	15.34	1.07	A	m	42	26.22	0.15	0.572082
1	22	2013	December	H	15.34	1.07	A	m	47	40.67	2.13	5.23728
1	23	2013	December	H	15.34	1.07	A	m	45	37.7	0.8	2.12202
1	24	2013	December	H	15.34	1.07	A	m	48	45.79	1.35	2.94824
1	25	2013	December	H	15.34	1.07	A	m	49	41.54	0.25	0.60183
1	26	2013	December	H	15.34	1.07	A	m	45	36.56	1.27	3.47374
1	27	2013	December	H	15.34	1.07	A	m	46	43.42	1.38	3.17826
1	28	2013	December	H	15.34	1.07	A	m	45	35.05	0.77	2.19686
1	29	2013	December	H	15.34	1.07	A	m	44	42.11	1.13	2.68345
1	30	2013	December	H	15.34	1.07	A	m	44	27.83	na	0
1	31	2013	December	H	15.34	1.07	B	g	54	64.33	2.13	3.31105
1	32	2013	December	H	15.34	1.07	B	g	53	73.83	5.21	7.05675
1	33	2013	December	H	15.34	1.07	B	g	59	90.19	3.64	4.03592
1	34	2013	December	H	15.34	1.07	B	g	51	61.31	3.97	6.47529
1	35	2013	December	H	15.34	1.07	B	g	57	77.71	4.59	5.90658
1	36	2013	December	H	15.34	1.07	B	g	56	76.45	2.61	3.414
1	37	2013	December	H	15.34	1.07	B	g	51	57.97	2.8	4.83008
1	38	2013	December	H	15.34	1.07	B	g	54	70.23	4.34	6.1797
1	39	2013	December	H	15.34	1.07	B	g	54	75.97	1.77	2.32987
1	40	2013	December	H	15.34	1.07	B	g	54	67.36	2.83	4.20131
1	41	2013	December	H	15.34	1.07	B	g	52	66.81	3.81	5.70274
1	42	2013	December	H	15.34	1.07	B	g	56	75.19	3.6	4.78787
1	43	2013	December	H	15.34	1.07	B	g	54	76.19	3.01	3.95065
1	44	2013	December	H	15.34	1.07	B	g	52	61.35	1.42	2.31459
1	45	2013	December	H	15.34	1.07	B	g	50	58.63	3.06	5.21917
1	46	2013	December	H	15.34	1.07	B	g	51	58.6	2.81	4.79522
1	47	2013	December	H	15.34	1.07	B	g	54	75.06	1.97	2.62457
1	48	2013	December	H	15.34	1.07	B	g	53	75.73	2.08	2.7466
1	49	2013	December	H	15.34	1.07	B	g	59	79.25	2.56	3.23028
1	50	2013	December	H	15.34	1.07	B	g	50	57.23	3.04	5.3119
1	51	2013	December	H	15.34	1.07	B	m	48	47.31	2.34	4.9461
1	52	2013	December	H	15.34	1.07	B	m	47	50.1	1.85	3.69261
1	53	2013	December	H	15.34	1.07	B	m	43	35.93	1.65	4.59226
1	54	2013	December	H	15.34	1.07	B	m	41	33.11	0.78	2.35578
1	55	2013	December	H	15.34	1.07	B	m	45	43.81	0.78	1.78042
1	56	2013	December	H	15.34	1.07	B	m	45	35.55	0.69	1.94093
1	57	2013	December	H	15.34	1.07	B	m	43	39.85	0.63	1.58093
1	58	2013	December	H	15.34	1.07	B	m	47	50.97	1.12	2.19737
1	59	2013	December	H	15.34	1.07	B	m	45	35.43	0.58	1.63703
1	60	2013	December	H	15.34	1.07	B	m	43	41.22	2.76	6.69578
1	1	2014	January	H	14.39	1.5	A	g	57	73.94	3.1	4.19259
1	2	2014	January	H	14.39	1.5	A	g	60	78.3	3.87	4.94253
1	3	2014	January	H	14.39	1.5	A	g	58	57.29	2.09	3.64811
1	4	2014	January	H	14.39	1.5	A	g	57	58.72	1.11	1.89033
1	5	2014	January	H	14.39	1.5	A	g	59	66.9	5.38	8.04185
1	6	2014	January	H	14.39	1.5	A	g	52	55.15	2.43	4.40617
1	7	2014	January	H	14.39	1.5	A	g	59	76.93	3.25	4.22462
1	8	2014	January	H	14.39	1.5	A	g	58	73.94	1.74	2.35326
1	9	2014	January	H	14.39	1.5	A	g	57	72.87	4.63	6.35378
1	10	2014	January	H	14.39	1.5	A	g	58	61.7	3.38	5.47812
1	11	2014	January	H	14.39	1.5	A	g	53	59.74	3.35	5.60763
1	12	2014	January	H	14.39	1.5	A	g	55	60.59	3.95	6.51923
1	13	2014	January	H	14.39	1.5	A	g	59	73.18	4.36	5.95791
1	14	2014	January	H	14.39	1.5	A	g	55	69.95	2.48	3.54539
1	15	2014	January	H	14.39	1.5	A	g	55	64.29	3.23	5.02411
1	16	2014	January	H	14.39	1.5	A	g	58	70.06	3.88	5.53811
1	17	2014	January	H	14.39	1.5	A	g	54	62.25	4.91	7.88755
1	18	2014	January	H	14.39	1.5	A	g	54	58.55	1.39	2.37404
1	19	2014	January	H	14.39	1.5	A	g	60	73.89	2.95	3.99242
1	20	2014	January	H	14.39	1.5	A	g	52	58.98	1.95	3.30621
1	21	2014	January	H	14.39	1.5	A	m	42	28.51	0.33	1.15749
1	22	2014	January	H	14.39	1.5	A	m	48	48.16	1.29	2.67857
1	23	2014	January	H	14.39	1.5	A	m	44	33.35	0.79	2.36882
1	24	2014	January	H	14.39	1.5	A	m	42	31.08	0.32	1.0296
1	25	2014	January	H	14.39	1.5	A	m	49	43.5	1.22	2.8046
1	26	2014	January	H	14.39	1.5	A	m	45	41.1	0.7	1.70316
1	27	2014	January	H	14.39	1.5	A	m	45	43.81	1.44	3.28692
1	28	2014	January	H	14.39	1.5	A	m	46	39.35	2.25	5.71792
1	29	2014	January	H	14.39	1.5	A	m	43	33.8	1.05	3.10651
1	30	2014	January	H	14.39	1.5	A	m	41	24.69	0.59	2.38963
1	31	2014	January	H	14.39	1.5	B	g	50	57.23	1.93	3.37236
1	32	2014	January	H	14.39	1.5	B	g	55	72.94	4.84	6.63559
1	33	2014	January	H	14.39	1.5	B	g	58	83.32	5.47	6.56505
1	34	2014	January	H	14.39	1.5	B	g	53	65.61	2.9	4.42006
1	35	2014	January	H	14.39	1.5	B	g	55	64.49	4.4	6.82276
1	36	2014	January	H	14.39	1.5	B	g	55	66.72	3.52	5.27578
1	37	2014	January	H	14.39	1.5	B	g	53	71.76	2.55	3.55351
1	38	2014	January	H	14.39	1.5	B	g	54	68.93	2.64	3.82997
1	39	2014	January	H	14.39	1.5	B	g	56	85.64	1.78	2.07847
1	40	2014	January	H	14.39	1.5	B	g	56	71.41	3.27	4.57919
1	41	2014	January	H	14.39	1.5	B	g	57	72.97	5.74	7.86625
1	42	2014	January	H	14.39	1.5	B	g	58	61.86	3.24	5.23763
1	43	2014	January	H	14.39	1.5	B	g	50	61.59	1.99	3.23104
1	44	2014	January	H	14.39	1.5	B	g	50	55.88	3.37	6.03078
1	45	2014	January	H	14.39	1.5	B	g	51	60.72	3.8	6.25823
1	46	2014	January	H	14.39	1.5	B	g	58	71.87	6.68	9.29456
1	47	2014	January	H	14.39	1.5	B	g	52	61.95	2.09	3.37369
1	48	2014	January	H	14.39	1.5	B	g	53	67.16	2.35	3.49911
1	49	2014	January	H	14.39	1.5	B	g	50	58.49	2.54	4.34262
1	50	2014	January	H	14.39	1.5	B	g	53	60.53	3.61	5.96398
1	51	2014	January	H	14.39	1.5	B	m	48	40.88	2.51	6.13992
1	52	2014	January	H	14.39	1.5	B	m	45	39.29	0.97	2.46882
1	53	2014	January	H	14.39	1.5	B	m	45	40.6	0.91	2.24138
1	54	2014	January	H	14.39	1.5	B	m	43	38	0.86	2.26316
1	55	2014	January	H	14.39	1.5	B	m	44	38.71	0.38	0.981658
1	56	2014	January	H	14.39	1.5	B	m	44	34.3	1.11	3.23615
1	57	2014	January	H	14.39	1.5	B	m	41	31.75	na	0
1	58	2014	January	H	14.39	1.5	B	m	43	31.14	1.76	5.65189
1	59	2014	January	H	14.39	1.5	B	m	42	30.82	1.48	4.80208
1	60	2014	January	H	14.39	1.5	B	m	47	46.21	3.32	7.18459
1	1	2014	February	H	13.88	1.47	A	g	55	69.82	2.08	2.97909
1	2	2014	February	H	13.88	1.47	A	g	61	79.77	5.49	6.88229
1	3	2014	February	H	13.88	1.47	A	g	56	65.39	3.41	5.21486
1	4	2014	February	H	13.88	1.47	A	g	56	72.17	6.63	9.18664
1	5	2014	February	H	13.88	1.47	A	g	54	67.89	4.74	6.98188
1	6	2014	February	H	13.88	1.47	A	g	54	61.75	3.1	5.02024
1	7	2014	February	H	13.88	1.47	A	g	54	66.62	3.85	5.77905
1	8	2014	February	H	13.88	1.47	A	g	53	56.66	3.16	5.57713
1	9	2014	February	H	13.88	1.47	A	g	53	58.02	1.46	2.51637
1	10	2014	February	H	13.88	1.47	A	g	59	66.84	4.1	6.13405
1	11	2014	February	H	13.88	1.47	A	g	54	61.04	4.77	7.81455
1	12	2014	February	H	13.88	1.47	A	g	56	68.05	5.08	7.4651
1	13	2014	February	H	13.88	1.47	A	g	55	74.18	3.23	4.35427
1	14	2014	February	H	13.88	1.47	A	g	53	56.52	3.68	6.51097
1	15	2014	February	H	13.88	1.47	A	g	51	58.76	2.17	3.69299
1	16	2014	February	H	13.88	1.47	A	g	50	54.14	1.97	3.63871
1	17	2014	February	H	13.88	1.47	A	g	55	65.43	4.32	6.60248
1	18	2014	February	H	13.88	1.47	A	g	54	61.62	1.67	2.71016
1	19	2014	February	H	13.88	1.47	A	g	56	68.68	3.27	4.76121
1	20	2014	February	H	13.88	1.47	A	g	52	62.26	1.83	2.93929
1	21	2014	February	H	13.88	1.47	A	m	41	25.09	0.26	1.03627
1	22	2014	February	H	13.88	1.47	A	m	48	42.46	1.83	4.30994
1	23	2014	February	H	13.88	1.47	A	m	44	33.31	0.91	2.73191
1	24	2014	February	H	13.88	1.47	A	m	47	38.3	0.98	2.55875
1	25	2014	February	H	13.88	1.47	A	m	48	36.93	1.22	3.30355
1	26	2014	February	H	13.88	1.47	A	m	43	38.55	0.4	1.03761
1	27	2014	February	H	13.88	1.47	A	m	44	45.46	1.35	2.96964
1	28	2014	February	H	13.88	1.47	A	m	43	28.63	0.75	2.61963
1	29	2014	February	H	13.88	1.47	A	m	48	42.23	1.99	4.71229
1	30	2014	February	H	13.88	1.47	A	m	49	42.24	2.23	5.27936
1	31	2014	February	H	13.88	1.47	B	g	53	69.2	3.42	4.9422
1	32	2014	February	H	13.88	1.47	B	g	56	77.67	3.42	4.40324
1	33	2014	February	H	13.88	1.47	B	g	52	70.6	3.7	5.24079
1	34	2014	February	H	13.88	1.47	B	g	51	61.39	3.28	5.34289
1	35	2014	February	H	13.88	1.47	B	g	51	66.46	3.96	5.95847
1	36	2014	February	H	13.88	1.47	B	g	53	62.79	1.7	2.70744
1	37	2014	February	H	13.88	1.47	B	g	51	67.15	4.51	6.71631
1	38	2014	February	H	13.88	1.47	B	g	55	78.98	4.18	5.29248
1	39	2014	February	H	13.88	1.47	B	g	51	62.86	4.63	7.36557
1	40	2014	February	H	13.88	1.47	B	g	54	76.86	3.65	4.74889
1	41	2014	February	H	13.88	1.47	B	g	52	65.81	2.88	4.37623
1	42	2014	February	H	13.88	1.47	B	g	51	50.34	3.3	6.55542
1	43	2014	February	H	13.88	1.47	B	g	61	99.97	6.12	6.12184
1	44	2014	February	H	13.88	1.47	B	g	54	70.15	6.15	8.76693
1	45	2014	February	H	13.88	1.47	B	g	52	69	5.96	8.63768
1	46	2014	February	H	13.88	1.47	B	g	53	73.22	3.08	4.2065
1	47	2014	February	H	13.88	1.47	B	g	52	69.47	3.67	5.28286
1	48	2014	February	H	13.88	1.47	B	g	54	61.11	3.61	5.90738
1	49	2014	February	H	13.88	1.47	B	g	50	56.06	4.7	8.38387
1	50	2014	February	H	13.88	1.47	B	g	51	56.89	4.12	7.24205
1	51	2014	February	H	13.88	1.47	B	m	47	48.94	3.13	6.39559
1	52	2014	February	H	13.88	1.47	B	m	48	55.45	3.44	6.20379
1	53	2014	February	H	13.88	1.47	B	m	44	38.47	1.94	5.04289
1	54	2014	February	H	13.88	1.47	B	m	47	43.45	2.32	5.33947
1	55	2014	February	H	13.88	1.47	B	m	48	49.53	3.38	6.82415
1	56	2014	February	H	13.88	1.47	B	m	46	41.59	1.43	3.43833
1	57	2014	February	H	13.88	1.47	B	m	43	32.94	0.94	2.85367
1	58	2014	February	H	13.88	1.47	B	m	45	40.35	1.03	2.55266
1	59	2014	February	H	13.88	1.47	B	m	43	31.85	0.23	0.722135
1	60	2014	February	H	13.88	1.47	B	m	41	34.41	1.07	3.10956
1	1	2014	March	H	13.64	1.25	A	g	51	64.14	3.17	4.94231
1	2	2014	March	H	13.64	1.25	A	g	54	56.6	5.42	9.57597
1	3	2014	March	H	13.64	1.25	A	g	60	76.53	3.63	4.74324
1	4	2014	March	H	13.64	1.25	A	g	60	88.52	5.79	6.54089
1	5	2014	March	H	13.64	1.25	A	g	55	63.39	2.59	4.08582
1	6	2014	March	H	13.64	1.25	A	g	52	60.45	3.68	6.08768
1	7	2014	March	H	13.64	1.25	A	g	53	66.88	4.11	6.14533
1	8	2014	March	H	13.64	1.25	A	g	53	57.87	4.22	7.29221
1	9	2014	March	H	13.64	1.25	A	g	54	63.05	3.52	5.58287
1	10	2014	March	H	13.64	1.25	A	g	57	78.51	5.11	6.50873
1	11	2014	March	H	13.64	1.25	A	g	53	58.37	2.89	4.95117
1	12	2014	March	H	13.64	1.25	A	g	53	61.45	5.29	8.60862
1	13	2014	March	H	13.64	1.25	A	g	57	78.63	5.62	7.1474
1	14	2014	March	H	13.64	1.25	A	g	62	97.47	6.41	6.57638
1	15	2014	March	H	13.64	1.25	A	g	53	69.33	4.28	6.17337
1	16	2014	March	H	13.64	1.25	A	g	52	64.26	6.71	10.442
1	17	2014	March	H	13.64	1.25	A	g	52	63.38	4.62	7.28937
1	18	2014	March	H	13.64	1.25	A	g	51	64.71	7.1	10.972
1	19	2014	March	H	13.64	1.25	A	g	53	67.55	4.2	6.21762
1	20	2014	March	H	13.64	1.25	A	g	51	56.66	4.36	7.69502
1	21	2014	March	H	13.64	1.25	A	m	48	49.43	1.47	2.9739
1	22	2014	March	H	13.64	1.25	A	m	47	53.45	3.13	5.85594
1	23	2014	March	H	13.64	1.25	A	m	45	37.71	1.3	3.44736
1	24	2014	March	H	13.64	1.25	A	m	46	45.73	3.06	6.69145
1	25	2014	March	H	13.64	1.25	A	m	48	48.02	2.14	4.45648
1	26	2014	March	H	13.64	1.25	A	m	43	32.8	1.75	5.33537
1	27	2014	March	H	13.64	1.25	A	m	46	37.42	1.25	3.34046
1	28	2014	March	H	13.64	1.25	A	m	42	30.03	0.96	3.1968
1	29	2014	March	H	13.64	1.25	A	m	44	29.41	0.25	0.850051
1	30	2014	March	H	13.64	1.25	A	m	47	32.64	0.9	2.75735
1	31	2014	March	H	13.64	1.25	B	g	53	67.3	2.25	3.34324
1	32	2014	March	H	13.64	1.25	B	g	51	64.48	4.92	7.63027
1	33	2014	March	H	13.64	1.25	B	g	56	76.15	4.11	5.39724
1	34	2014	March	H	13.64	1.25	B	g	55	76.39	3.67	4.80429
1	35	2014	March	H	13.64	1.25	B	g	53	63.44	3.25	5.12295
1	36	2014	March	H	13.64	1.25	B	g	53	71.63	3.49	4.87226
1	37	2014	March	H	13.64	1.25	B	g	54	70.22	6.36	9.05725
1	38	2014	March	H	13.64	1.25	B	g	53	72.33	4.03	5.57169
1	39	2014	March	H	13.64	1.25	B	g	52	65.36	3.98	6.08935
1	40	2014	March	H	13.64	1.25	B	g	51	67.35	3.22	4.78099
1	41	2014	March	H	13.64	1.25	B	g	58	81.88	5.58	6.81485
1	42	2014	March	H	13.64	1.25	B	g	54	63.82	3.85	6.03259
1	43	2014	March	H	13.64	1.25	B	g	58	76.02	6.06	7.97159
1	44	2014	March	H	13.64	1.25	B	g	54	65.6	4.52	6.89024
1	45	2014	March	H	13.64	1.25	B	g	52	54.77	6.06	11.0645
1	46	2014	March	H	13.64	1.25	B	g	57	65.83	3.38	5.13444
1	47	2014	March	H	13.64	1.25	B	g	52	61.42	3.54	5.76359
1	48	2014	March	H	13.64	1.25	B	g	55	58.1	3.81	6.55766
1	49	2014	March	H	13.64	1.25	B	g	50	54.64	4	7.32064
1	50	2014	March	H	13.64	1.25	B	g	53	55.43	2.24	4.04113
1	51	2014	March	H	13.64	1.25	B	m	46	49.13	2.02	4.11154
1	52	2014	March	H	13.64	1.25	B	m	48	52.92	4.07	7.69085
1	53	2014	March	H	13.64	1.25	B	m	42	35.9	2.4	6.68524
1	54	2014	March	H	13.64	1.25	B	m	43	36.4	1.86	5.10989
1	55	2014	March	H	13.64	1.25	B	m	45	45.31	2.16	4.76716
1	56	2014	March	H	13.64	1.25	B	m	44	41.14	2.71	6.58726
1	57	2014	March	H	13.64	1.25	B	m	45	36.7	1.4	3.81471
1	58	2014	March	H	13.64	1.25	B	m	49	53.2	1.25	2.34962
1	59	2014	March	H	13.64	1.25	B	m	41	30.51	1.64	5.37529
1	60	2014	March	H	13.64	1.25	B	m	46	41.19	1.3	3.15611
1	1	2014	April	H	15.74	0.99	A	g	55	65.51	3.3	5.0374
1	2	2014	April	H	15.74	0.99	A	g	53	49.73	1.6	3.21737
1	3	2014	April	H	15.74	0.99	A	g	56	72.26	5.83	8.06809
1	4	2014	April	H	15.74	0.99	A	g	54	56.13	2.71	4.82808
1	5	2014	April	H	15.74	0.99	A	g	59	77.16	1.33	1.72369
1	6	2014	April	H	15.74	0.99	A	g	56	52.02	3.15	6.05536
1	7	2014	April	H	15.74	0.99	A	g	52	58.32	5.04	8.64198
1	8	2014	April	H	15.74	0.99	A	g	58	67.51	4.92	7.28781
1	9	2014	April	H	15.74	0.99	A	g	52	56.79	3.56	6.26871
1	10	2014	April	H	15.74	0.99	A	g	54	62.76	2.9	4.62078
1	11	2014	April	H	15.74	0.99	A	g	56	65.9	2.39	3.62671
1	12	2014	April	H	15.74	0.99	A	g	52	60.06	2.31	3.84615
1	13	2014	April	H	15.74	0.99	A	g	51	58.79	1.81	3.07875
1	14	2014	April	H	15.74	0.99	A	g	53	59.02	1.48	2.50762
1	15	2014	April	H	15.74	0.99	A	g	62	88.31	3.66	4.14449
1	16	2014	April	H	15.74	0.99	A	g	54	58.46	4.15	7.09887
1	17	2014	April	H	15.74	0.99	A	g	59	86.14	3.84	4.45786
1	18	2014	April	H	15.74	0.99	A	g	54	68.63	2.73	3.97785
1	19	2014	April	H	15.74	0.99	A	g	55	76.74	2.05	2.67136
1	20	2014	April	H	15.74	0.99	A	g	56	66.05	2.49	3.76987
1	21	2014	April	H	15.74	0.99	A	m	49	46.93	3.52	7.50053
1	22	2014	April	H	15.74	0.99	A	m	42	36.59	0.89	2.43236
1	23	2014	April	H	15.74	0.99	A	m	48	44.25	0.2	0.451977
1	24	2014	April	H	15.74	0.99	A	m	40	28.73	0.55	1.91438
1	25	2014	April	H	15.74	0.99	A	m	49	51.4	2.02	3.92996
1	26	2014	April	H	15.74	0.99	A	m	45	32.1	0.67	2.08723
1	27	2014	April	H	15.74	0.99	A	m	48	43.78	1.84	4.20283
1	28	2014	April	H	15.74	0.99	A	m	47	40.82	1.28	3.13572
1	29	2014	April	H	15.74	0.99	A	m	47	48.63	1.27	2.61156
1	30	2014	April	H	15.74	0.99	A	m	49	61.26	3.93	6.41528
1	31	2014	April	H	15.74	0.99	B	g	54	71.02	3.25	4.57618
1	32	2014	April	H	15.74	0.99	B	g	53	74.7	3.1	4.14993
1	33	2014	April	H	15.74	0.99	B	g	55	74.75	2.96	3.95987
1	34	2014	April	H	15.74	0.99	B	g	50	63.71	2.73	4.28504
1	35	2014	April	H	15.74	0.99	B	g	54	85.19	3.74	4.39019
1	36	2014	April	H	15.74	0.99	B	g	50	62.88	4.64	7.37913
1	37	2014	April	H	15.74	0.99	B	g	53	74.02	7.37	9.95677
1	38	2014	April	H	15.74	0.99	B	g	55	81.57	6.91	8.47125
1	39	2014	April	H	15.74	0.99	B	g	53	69.32	3.16	4.55857
1	40	2014	April	H	15.74	0.99	B	g	56	83.73	6.05	7.22561
1	41	2014	April	H	15.74	0.99	B	g	53	64.39	3.86	5.99472
1	42	2014	April	H	15.74	0.99	B	g	53	63.18	3.55	5.61887
1	43	2014	April	H	15.74	0.99	B	g	54	62.39	5.72	9.16814
1	44	2014	April	H	15.74	0.99	B	g	51	63.79	5.64	8.84151
1	45	2014	April	H	15.74	0.99	B	g	54	68.84	4.38	6.36258
1	46	2014	April	H	15.74	0.99	B	g	53	62.16	3.92	6.30631
1	47	2014	April	H	15.74	0.99	B	g	53	62.83	2.37	3.77208
1	48	2014	April	H	15.74	0.99	B	g	53	62.42	5.65	9.05159
1	49	2014	April	H	15.74	0.99	B	g	53	56.72	2.55	4.49577
1	50	2014	April	H	15.74	0.99	B	g	55	66.17	4.93	7.45051
1	51	2014	April	H	15.74	0.99	B	m	47	43.71	4.56	10.4324
1	52	2014	April	H	15.74	0.99	B	m	47	43.48	3.36	7.72769
1	53	2014	April	H	15.74	0.99	B	m	43	31.26	0.85	2.71913
1	54	2014	April	H	15.74	0.99	B	m	45	40.87	3.36	8.22119
1	55	2014	April	H	15.74	0.99	B	m	44	41.33	0.59	1.42753
1	56	2014	April	H	15.74	0.99	B	m	47	44.51	2.99	6.71759
1	57	2014	April	H	15.74	0.99	B	m	49	37.59	1.8	4.78851
1	58	2014	April	H	15.74	0.99	B	m	44	32.22	na	0
1	59	2014	April	H	15.74	0.99	B	m	41	33.15	1.26	3.8009
1	60	2014	April	H	15.74	0.99	B	m	43	32.53	1.08	3.32001
1	1	2014	May	H	17.27	0.95	A	g	59	73.7	1.07	1.45183
1	2	2014	May	H	17.27	0.95	A	g	54	57.05	0.64	1.12182
1	3	2014	May	H	17.27	0.95	A	g	51	51.36	0.93	1.81075
1	4	2014	May	H	17.27	0.95	A	g	52	65.06	1.11	1.70612
1	5	2014	May	H	17.27	0.95	A	g	55	65.74	1.91	2.90538
1	6	2014	May	H	17.27	0.95	A	g	51	53.25	0.49	0.920188
1	7	2014	May	H	17.27	0.95	A	g	55	62.6	0.91	1.45367
1	8	2014	May	H	17.27	0.95	A	g	62	82.76	2.71	3.27453
1	9	2014	May	H	17.27	0.95	A	g	58	71.45	1.32	1.84745
1	10	2014	May	H	17.27	0.95	A	g	52	56	0.82	1.46429
1	11	2014	May	H	17.27	0.95	A	g	52	53.49	0.37	0.691718
1	12	2014	May	H	17.27	0.95	A	g	51	57.53	1.35	2.3466
1	13	2014	May	H	17.27	0.95	A	g	50	62.59	0.21	0.335517
1	14	2014	May	H	17.27	0.95	A	g	50	48.65	0.84	1.72662
1	15	2014	May	H	17.27	0.95	A	g	56	74.75	0.81	1.08361
1	16	2014	May	H	17.27	0.95	A	g	52	57.4	0.34	0.592334
1	17	2014	May	H	17.27	0.95	A	g	50	41.09	0.64	1.55756
1	18	2014	May	H	17.27	0.95	A	g	51	52.95	0.67	1.26534
1	19	2014	May	H	17.27	0.95	A	g	51	54.65	0.84	1.53705
1	20	2014	May	H	17.27	0.95	A	g	55	70.31	1.47	2.09074
1	21	2014	May	H	17.27	0.95	A	m	45	40.44	0.51	1.26113
1	22	2014	May	H	17.27	0.95	A	m	43	36.87	0.15	0.406835
1	23	2014	May	H	17.27	0.95	A	m	41	28.31	0.35	1.23631
1	24	2014	May	H	17.27	0.95	A	m	41	28.15	0.39	1.38544
1	25	2014	May	H	17.27	0.95	A	m	43	39.01	0.43	1.10228
1	26	2014	May	H	17.27	0.95	A	m	45	34.46	0.32	0.928613
1	27	2014	May	H	17.27	0.95	A	m	43	35.63	0.26	0.729722
1	28	2014	May	H	17.27	0.95	A	m	44	33.35	0.12	0.35982
1	29	2014	May	H	17.27	0.95	A	m	44	36.6	0.23	0.628415
1	30	2014	May	H	17.27	0.95	A	m	43	32.53	0.33	1.01445
1	31	2014	May	H	17.27	0.95	B	g	57	90	1.61	1.78889
1	32	2014	May	H	17.27	0.95	B	g	60	85.58	0.77	0.899743
1	33	2014	May	H	17.27	0.95	B	g	52	72.1	1.54	2.13592
1	34	2014	May	H	17.27	0.95	B	g	58	81.45	0.94	1.15408
1	35	2014	May	H	17.27	0.95	B	g	54	73.77	1.12	1.51823
1	36	2014	May	H	17.27	0.95	B	g	55	66.24	1.26	1.90217
1	37	2014	May	H	17.27	0.95	B	g	51	59.16	0.98	1.65652
1	38	2014	May	H	17.27	0.95	B	g	53	65.99	1.85	2.80346
1	39	2014	May	H	17.27	0.95	B	g	55	63.74	0.86	1.34923
1	40	2014	May	H	17.27	0.95	B	g	56	70.82	1.1	1.55323
1	41	2014	May	H	17.27	0.95	B	g	56	73.41	1.92	2.61545
1	42	2014	May	H	17.27	0.95	B	g	53	71.51	0.95	1.32849
1	43	2014	May	H	17.27	0.95	B	g	56	69.86	1.12	1.60321
1	44	2014	May	H	17.27	0.95	B	g	52	75.37	2.41	3.19756
1	45	2014	May	H	17.27	0.95	B	g	54	69.35	0.72	1.03821
1	46	2014	May	H	17.27	0.95	B	g	54	71.25	1.04	1.45965
1	47	2014	May	H	17.27	0.95	B	g	53	60.33	0.69	1.14371
1	48	2014	May	H	17.27	0.95	B	g	54	69.39	0.78	1.12408
1	49	2014	May	H	17.27	0.95	B	g	56	80.8	0.79	0.977723
1	50	2014	May	H	17.27	0.95	B	g	52	59.17	1.05	1.77455
1	51	2014	May	H	17.27	0.95	B	m	47	46.79	1.9	4.0607
1	52	2014	May	H	17.27	0.95	B	m	47	46.7	0.71	1.52034
1	53	2014	May	H	17.27	0.95	B	m	41	32.36	0.66	2.03956
1	54	2014	May	H	17.27	0.95	B	m	43	32.03	0.32	0.999063
1	55	2014	May	H	17.27	0.95	B	m	41	39.05	0.59	1.51088
1	56	2014	May	H	17.27	0.95	B	m	42	37.06	1.27	3.42688
1	57	2014	May	H	17.27	0.95	B	m	48	52.48	0.67	1.27668
1	58	2014	May	H	17.27	0.95	B	m	44	44.96	na	0
1	59	2014	May	H	17.27	0.95	B	m	43	38.3	0.54	1.40992
1	60	2014	May	H	17.27	0.95	B	m	41	33.94	0.44	1.29641
2	3	2015	June	H	21.82	0.66	A	g	57	59.67	1.22	2.04458
2	4	2015	June	H	21.82	0.66	A	g	55	60.73	2.09	3.44146
2	5	2015	June	H	21.82	0.66	A	g	50	48.23	3.45	7.15322
2	6	2015	June	H	21.82	0.66	A	g	53	55.82	1.71	3.06342
2	8	2015	June	H	21.82	0.66	A	g	50	53.27	1.34	2.51549
2	11	2015	June	H	21.82	0.66	A	g	52	61.53	1.26	2.04778
2	12	2015	June	H	21.82	0.66	A	g	54	62.03	1.94	3.12752
2	14	2015	June	H	21.82	0.66	A	g	50	43.58	0.45	1.03258
2	17	2015	June	H	21.82	0.66	A	g	54	62.05	0.68	1.09589
2	18	2015	June	H	21.82	0.66	A	g	51	52.25	1.17	2.23923
2	20	2015	June	H	21.82	0.66	A	g	50	46.68	0.99	2.12082
2	1	2015	June	H	21.82	0.66	A	m	45	38.15	1.14	2.9882
2	2	2015	June	H	21.82	0.66	A	m	48	49.94	1.1	2.20264
2	7	2015	June	H	21.82	0.66	A	m	48	37.71	0.64	1.69716
2	9	2015	June	H	21.82	0.66	A	m	47	34.98	1.01	2.88736
2	10	2015	June	H	21.82	0.66	A	m	49	42.65	0.44	1.03165
2	13	2015	June	H	21.82	0.66	A	m	48	36.98	0.73	1.97404
2	15	2015	June	H	21.82	0.66	A	m	49	44.9	0.8	1.78174
2	16	2015	June	H	21.82	0.66	A	m	49	43.68	0.2	0.457875
2	19	2015	June	H	21.82	0.66	A	m	47	45.59	0.65	1.42575
2	2	2015	July	H	25.35	0.68	A	g	50	49.97	0.7	1.40084
2	4	2015	July	H	25.35	0.68	A	g	50	44.9	0.83	1.84855
2	5	2015	July	H	25.35	0.68	A	g	50	54.12	1.83	3.38137
2	7	2015	July	H	25.35	0.68	A	g	50	54.9	0.95	1.73042
2	8	2015	July	H	25.35	0.68	A	g	50	51.74	1.04	2.01005
2	9	2015	July	H	25.35	0.68	A	g	54	60.48	1.38	2.28175
2	10	2015	July	H	25.35	0.68	A	g	53	55.52	1.13	2.0353
2	11	2015	July	H	25.35	0.68	A	g	60	83.3	1.43	1.71669
2	12	2015	July	H	25.35	0.68	A	g	51	53.13	1.12	2.10804
2	13	2015	July	H	25.35	0.68	A	g	54	53.15	1.44	2.70931
2	14	2015	July	H	25.35	0.68	A	g	53	60.48	2.29	3.78638
2	16	2015	July	H	25.35	0.68	A	g	54	64.1	1.49	2.32449
2	18	2015	July	H	25.35	0.68	A	g	54	58.78	1.79	3.04525
2	19	2015	July	H	25.35	0.68	A	g	53	46.62	0.52	1.1154
2	20	2015	July	H	25.35	0.68	A	g	58	67.3	1.04	1.54532
2	1	2015	July	H	25.35	0.68	A	m	45	37.15	0.5	1.3459
2	3	2015	July	H	25.35	0.68	A	m	48	44.84	0.79	1.76182
2	6	2015	July	H	25.35	0.68	A	m	49	47.59	0.9	1.89115
2	15	2015	July	H	25.35	0.68	A	m	49	46.79	0.73	1.56016
2	17	2015	July	H	25.35	0.68	A	m	49	47.78	1.05	2.19757
2	1	2015	August	H	24.72	0.67	A	g	51	52.58	0.63	1.19817
2	2	2015	August	H	24.72	0.67	A	g	52	49.42	1.1	2.22582
2	3	2015	August	H	24.72	0.67	A	g	55	57.02	1.6	2.80603
2	4	2015	August	H	24.72	0.67	A	g	54	58.48	1.62	2.77018
2	5	2015	August	H	24.72	0.67	A	g	54	60.68	1.74	2.8675
2	6	2015	August	H	24.72	0.67	A	g	53	66.69	1.6	2.39916
2	8	2015	August	H	24.72	0.67	A	g	55	60.09	1.9	3.16192
2	10	2015	August	H	24.72	0.67	A	g	50	44.47	0.9	2.02384
2	11	2015	August	H	24.72	0.67	A	g	64	94.88	2.23	2.35034
2	12	2015	August	H	24.72	0.67	A	g	51	52.16	0.64	1.22699
2	13	2015	August	H	24.72	0.67	A	g	60	83.77	1.99	2.37555
2	14	2015	August	H	24.72	0.67	A	g	50	48.45	1.07	2.20846
2	15	2015	August	H	24.72	0.67	A	g	57	79.55	2.96	3.72093
2	16	2015	August	H	24.72	0.67	A	g	53	50.22	1.35	2.68817
2	17	2015	August	H	24.72	0.67	A	g	51	54.81	1.26	2.29885
2	18	2015	August	H	24.72	0.67	A	g	52	55.94	0	0
2	19	2015	August	H	24.72	0.67	A	g	55	67.29	2.64	3.92332
2	20	2015	August	H	24.72	0.67	A	g	59	79.17	2.94	3.71353
2	7	2015	August	H	24.72	0.67	A	m	49	39.32	0.18	0.457782
2	9	2015	August	H	24.72	0.67	A	m	48	43.88	0.97	2.21057
2	2	2015	September	H	24.13	0.84	A	g	52	45.7	0.77	1.6849
2	4	2015	September	H	24.13	0.84	A	g	52	53.44	1.46	2.73204
2	6	2015	September	H	24.13	0.84	A	g	55	70.71	0.57	0.806109
2	8	2015	September	H	24.13	0.84	A	g	51	59.37	1.64	2.76234
2	10	2015	September	H	24.13	0.84	A	g	50	53.29	0.77	1.44492
2	11	2015	September	H	24.13	0.84	A	g	60	88.05	2.98	3.38444
2	12	2015	September	H	24.13	0.84	A	g	50	55.96	1.8	3.21658
2	13	2015	September	H	24.13	0.84	A	g	52	58.68	1.88	3.20382
2	14	2015	September	H	24.13	0.84	A	g	52	56.87	1.35	2.37384
2	15	2015	September	H	24.13	0.84	A	g	55	63.76	1.41	2.21142
2	17	2015	September	H	24.13	0.84	A	g	55	59.37	0.53	0.892707
2	1	2015	September	H	24.13	0.84	A	m	48	46.42	1.36	2.92977
2	3	2015	September	H	24.13	0.84	A	m	46	41.94	0.37	0.882213
2	5	2015	September	H	24.13	0.84	A	m	49	44.63	1.23	2.75599
2	7	2015	September	H	24.13	0.84	A	m	49	42.3	0.73	1.72577
2	9	2015	September	H	24.13	0.84	A	m	48	26.71	0.83	3.10745
2	16	2015	September	H	24.13	0.84	A	m	48	41.32	0.79	1.91191
2	18	2015	September	H	24.13	0.84	A	m	49	46.17	0.84	1.81936
2	19	2015	September	H	24.13	0.84	A	m	48	42.23	0.34	0.805115
2	20	2015	September	H	24.13	0.84	A	m	49	45.92	1.13	2.4608
2	2	2015	October	H	20.72	0.9	A	g	52	56.87	2.3	4.04431
2	3	2015	October	H	20.72	0.9	A	g	51	54.82	2.11	3.84896
2	6	2015	October	H	20.72	0.9	A	g	53	59.49	3.52	5.91696
2	8	2015	October	H	20.72	0.9	A	g	50	46.92	1.34	2.85592
2	13	2015	October	H	20.72	0.9	A	g	51	53.09	1.11	2.09079
2	15	2015	October	H	20.72	0.9	A	g	53	53.97	1.96	3.63165
2	16	2015	October	H	20.72	0.9	A	g	50	44.43	1.68	3.78123
2	17	2015	October	H	20.72	0.9	A	g	51	46.82	2.09	4.4639
2	18	2015	October	H	20.72	0.9	A	g	50	49.15	1.28	2.60427
2	20	2015	October	H	20.72	0.9	A	g	51	45.9	1.59	3.46405
2	1	2015	October	H	20.72	0.9	A	m	46	36.46	1.19	3.26385
2	4	2015	October	H	20.72	0.9	A	m	49	46.81	1.4	2.99081
2	5	2015	October	H	20.72	0.9	A	m	49	42.28	1.39	3.28761
2	7	2015	October	H	20.72	0.9	A	m	48	44.97	1.56	3.46898
2	9	2015	October	H	20.72	0.9	A	m	46	38.23	0.77	2.01413
2	10	2015	October	H	20.72	0.9	A	m	48	44.67	1.53	3.42512
2	11	2015	October	H	20.72	0.9	A	m	46	40.54	1.39	3.42871
2	12	2015	October	H	20.72	0.9	A	m	48	45.93	1.54	3.35293
2	14	2015	October	H	20.72	0.9	A	m	49	54.04	1.1	2.03553
2	19	2015	October	H	20.72	0.9	A	m	45	38.45	1.03	2.6788
2	3	2015	November	H	19.03	1.32	A	g	50	51.13	0.95	1.85801
2	4	2015	November	H	19.03	1.32	A	g	50	48.27	1.45	3.00394
2	5	2015	November	H	19.03	1.32	A	g	52	54.59	0.52	0.952555
2	6	2015	November	H	19.03	1.32	A	g	61	85.41	3.4	3.9808
2	7	2015	November	H	19.03	1.32	A	g	60	81.82	2	2.44439
2	8	2015	November	H	19.03	1.32	A	g	58	72.56	4.35	5.99504
2	9	2015	November	H	19.03	1.32	A	g	51	55.94	1.02	1.82338
2	10	2015	November	H	19.03	1.32	A	g	55	69.19	3.18	4.59604
2	11	2015	November	H	19.03	1.32	A	g	57	80.78	2.02	2.50062
2	12	2015	November	H	19.03	1.32	A	g	51	58.04	1.96	3.37698
2	13	2015	November	H	19.03	1.32	A	g	53	56.6	0.93	1.64311
2	14	2015	November	H	19.03	1.32	A	g	50	55.52	1.62	2.91787
2	15	2015	November	H	19.03	1.32	A	g	51	62.4	2.46	3.94231
2	16	2015	November	H	19.03	1.32	A	g	52	57.48	2.47	4.29715
2	17	2015	November	H	19.03	1.32	A	g	53	59.2	2.01	3.39527
2	18	2015	November	H	19.03	1.32	A	g	52	62.85	2.8	4.45505
2	19	2015	November	H	19.03	1.32	A	g	50	49.8	0.69	1.38554
2	20	2015	November	H	19.03	1.32	A	g	50	51.29	1.75	3.41197
2	1	2015	November	H	19.03	1.32	A	m	49	48.6	1.18	2.42798
2	2	2015	November	H	19.03	1.32	A	m	48	45.66	0.29	0.635129
2	2	2015	December	H	16.13	0.3	A	g	59	83.4	2.43	2.91367
2	3	2015	December	H	16.13	0.3	A	g	53	61.72	1.98	3.20804
2	6	2015	December	H	16.13	0.3	A	g	58	80.39	2.26	2.81129
2	7	2015	December	H	16.13	0.3	A	g	54	61.28	1.94	3.1658
2	8	2015	December	H	16.13	0.3	A	g	53	56.57	2.58	4.56072
2	9	2015	December	H	16.13	0.3	A	g	52	52.91	0.31	0.585901
2	10	2015	December	H	16.13	0.3	A	g	51	53.99	1.48	2.74125
2	13	2015	December	H	16.13	0.3	A	g	50	46.13	1.25	2.70973
2	14	2015	December	H	16.13	0.3	A	g	52	54.46	2.45	4.49871
2	15	2015	December	H	16.13	0.3	A	g	53	57.53	2.07	3.59812
2	18	2015	December	H	16.13	0.3	A	g	53	62.11	4.4	7.08421
2	19	2015	December	H	16.13	0.3	A	g	56	74.08	2.27	3.06425
2	20	2015	December	H	16.13	0.3	A	g	52	59.48	2.03	3.41291
2	1	2015	December	H	16.13	0.3	A	m	49	52.55	1.31	2.49286
2	4	2015	December	H	16.13	0.3	A	m	46	48.32	1.38	2.85596
2	5	2015	December	H	16.13	0.3	A	m	47	46.94	0.7	1.49127
2	11	2015	December	H	16.13	0.3	A	m	48	40.59	1.39	3.42449
2	12	2015	December	H	16.13	0.3	A	m	49	35.34	1.12	3.16921
2	16	2015	December	H	16.13	0.3	A	m	49	57.25	1.5	2.62009
2	17	2015	December	H	16.13	0.3	A	m	46	41.3	0.6	1.45278
2	1	2016	January	H	15.27	1.53	A	g	53	59.68	1.88	3.15013
2	2	2016	January	H	15.27	1.53	A	g	59	74.71	4	5.35404
2	3	2016	January	H	15.27	1.53	A	g	54	64.15	2.9	4.52065
2	5	2016	January	H	15.27	1.53	A	g	50	50.81	1.91	3.7591
2	6	2016	January	H	15.27	1.53	A	g	53	57.5	3.08	5.35652
2	8	2016	January	H	15.27	1.53	A	g	56	73.19	2.7	3.68903
2	10	2016	January	H	15.27	1.53	A	g	56	78.74	3.79	4.81331
2	11	2016	January	H	15.27	1.53	A	g	54	64.52	2.3	3.56479
2	12	2016	January	H	15.27	1.53	A	g	53	50.05	1.67	3.33666
2	13	2016	January	H	15.27	1.53	A	g	54	58.18	1.18	2.02819
2	14	2016	January	H	15.27	1.53	A	g	52	52.63	0.47	0.893027
2	15	2016	January	H	15.27	1.53	A	g	50	54.91	0.94	1.71189
2	16	2016	January	H	15.27	1.53	A	g	50	48.92	0.53	1.0834
2	17	2016	January	H	15.27	1.53	A	g	50	54.59	3.94	7.21744
2	18	2016	January	H	15.27	1.53	A	g	53	63.24	6.6	10.4364
2	19	2016	January	H	15.27	1.53	A	g	50	50.62	2	3.95101
2	20	2016	January	H	15.27	1.53	A	g	51	51.46	2.97	5.77147
2	4	2016	January	H	15.27	1.53	A	m	49	43.35	0.95	2.19146
2	7	2016	January	H	15.27	1.53	A	m	49	41.01	0.71	1.73129
2	9	2016	January	H	15.27	1.53	A	m	47	46.13	1.59	3.44678
2	1	2016	February	H	14.6	1.93	A	g	55	58.65	3.76	6.41091
2	5	2016	February	H	14.6	1.93	A	g	56	69.05	1.92	2.78059
2	6	2016	February	H	14.6	1.93	A	g	52	54.82	3.65	6.65815
2	7	2016	February	H	14.6	1.93	A	g	51	56.04	0.95	1.69522
2	9	2016	February	H	14.6	1.93	A	g	50	53.45	2.27	4.24696
2	11	2016	February	H	14.6	1.93	A	g	57	70.12	2.25	3.20878
2	12	2016	February	H	14.6	1.93	A	g	52	56.06	1.91	3.40706
2	13	2016	February	H	14.6	1.93	A	g	50	53.12	4.56	8.58434
2	14	2016	February	H	14.6	1.93	A	g	52	56.12	2.86	5.09622
2	15	2016	February	H	14.6	1.93	A	g	51	56.66	2.75	4.85351
2	17	2016	February	H	14.6	1.93	A	g	53	54.48	3.9	7.15859
2	18	2016	February	H	14.6	1.93	A	g	53	63.86	1.9	2.97526
2	19	2016	February	H	14.6	1.93	A	g	51	55.59	2.36	4.24537
2	20	2016	February	H	14.6	1.93	A	g	55	67.4	3.23	4.79228
2	2	2016	February	H	14.6	1.93	A	m	47	43.16	2.1	4.86562
2	3	2016	February	H	14.6	1.93	A	m	48	42.36	0.8	1.88857
2	4	2016	February	H	14.6	1.93	A	m	49	41.56	1.15	2.76708
2	8	2016	February	H	14.6	1.93	A	m	49	55.63	2.05	3.68506
2	10	2016	February	H	14.6	1.93	A	m	47	40.51	1.75	4.31992
2	16	2016	February	H	14.6	1.93	A	m	49	48.02	2.49	5.18534
2	1	2016	March	H	14.16	1.36	A	g	51	58.42	2.08	3.56042
2	2	2016	March	H	14.16	1.36	A	g	56	61.04	1.53	2.50655
2	3	2016	March	H	14.16	1.36	A	g	51	56.2	3.03	5.39146
2	4	2016	March	H	14.16	1.36	A	g	53	64.77	2.48	3.82893
2	5	2016	March	H	14.16	1.36	A	g	50	56.49	5.79	10.2496
2	7	2016	March	H	14.16	1.36	A	g	52	58.39	2.1	3.59651
2	9	2016	March	H	14.16	1.36	A	g	52	56.88	1.23	2.16245
2	10	2016	March	H	14.16	1.36	A	g	52	61.94	2.59	4.18147
2	11	2016	March	H	14.16	1.36	A	g	61	86.68	8.02	9.25242
2	12	2016	March	H	14.16	1.36	A	g	53	58.66	2.32	3.95499
2	13	2016	March	H	14.16	1.36	A	g	54	57.41	4.36	7.5945
2	15	2016	March	H	14.16	1.36	A	g	55	73.02	4.38	5.99836
2	16	2016	March	H	14.16	1.36	A	g	56	69.99	6.2	8.85841
2	17	2016	March	H	14.16	1.36	A	g	53	67.6	3.39	5.01479
2	18	2016	March	H	14.16	1.36	A	g	51	48.01	2.93	6.1029
2	19	2016	March	H	14.16	1.36	A	g	54	64.84	3.18	4.90438
2	6	2016	March	H	14.16	1.36	A	m	49	49.94	3.63	7.26872
2	8	2016	March	H	14.16	1.36	A	m	48	43.7	2.22	5.08009
2	14	2016	March	H	14.16	1.36	A	m	48	50.92	2.68	5.26316
2	20	2016	March	H	14.16	1.36	A	m	49	50.28	2.14	4.25617
2	2	2016	April	H	15.98	1.03	A	g	55	54.13	2.7	4.98799
2	4	2016	April	H	15.98	1.03	A	g	54	56.92	4.02	7.06254
2	5	2016	April	H	15.98	1.03	A	g	50	53.28	1.62	3.04054
2	6	2016	April	H	15.98	1.03	A	g	50	49.9	2.99	5.99198
2	7	2016	April	H	15.98	1.03	A	g	56	65.26	1.43	2.19124
2	8	2016	April	H	15.98	1.03	A	g	53	56.54	3.56	6.29643
2	11	2016	April	H	15.98	1.03	A	g	52	59.56	4.94	8.29416
2	12	2016	April	H	15.98	1.03	A	g	52	52.53	1.4	2.66514
2	13	2016	April	H	15.98	1.03	A	g	54	68.14	2.01	2.94981
2	15	2016	April	H	15.98	1.03	A	g	55	66.88	3.25	4.85945
2	17	2016	April	H	15.98	1.03	A	g	54	56.18	3.05	5.42898
2	20	2016	April	H	15.98	1.03	A	g	51	53.1	1.47	2.76836
2	1	2016	April	H	15.98	1.03	A	m	49	54.27	3.93	7.24157
2	3	2016	April	H	15.98	1.03	A	m	48	48.59	2.13	4.38362
2	9	2016	April	H	15.98	1.03	A	m	46	45.06	1.86	4.12783
2	10	2016	April	H	15.98	1.03	A	m	46	38.89	0.27	0.694266
2	14	2016	April	H	15.98	1.03	A	m	48	47.75	3.13	6.55497
2	16	2016	April	H	15.98	1.03	A	m	48	39.52	1.75	4.42814
2	18	2016	April	H	15.98	1.03	A	m	46	40.66	2.4	5.90261
2	19	2016	April	H	15.98	1.03	A	m	47	38.7	2.25	5.81395
2	1	2016	May	H	17.04	1.13	A	g	55	48.7	1.08	2.21766
2	2	2016	May	H	17.04	1.13	A	g	55	55.28	3.16	5.71635
2	3	2016	May	H	17.04	1.13	A	g	50	54.18	1.99	3.67294
2	8	2016	May	H	17.04	1.13	A	g	51	51.36	1.46	2.84268
2	10	2016	May	H	17.04	1.13	A	g	65	94.98	5.29	5.56959
2	11	2016	May	H	17.04	1.13	A	g	53	60.68	2.85	4.69677
2	14	2016	May	H	17.04	1.13	A	g	55	64.9	2.29	3.52851
2	15	2016	May	H	17.04	1.13	A	g	52	57.82	3.72	6.43376
2	16	2016	May	H	17.04	1.13	A	g	51	56.54	2.77	4.89919
2	17	2016	May	H	17.04	1.13	A	g	55	65.34	5.43	8.31038
2	18	2016	May	H	17.04	1.13	A	g	53	57.84	6.9	11.9295
2	19	2016	May	H	17.04	1.13	A	g	54	63.03	3.07	4.8707
2	20	2016	May	H	17.04	1.13	A	g	56	66.74	4.54	6.80252
2	4	2016	May	H	17.04	1.13	A	m	47	51.6	3.45	6.68605
2	5	2016	May	H	17.04	1.13	A	m	46	39.12	1.39	3.55317
2	6	2016	May	H	17.04	1.13	A	m	48	44.25	1.48	3.34463
2	7	2016	May	H	17.04	1.13	A	m	48	50.58	1.76	3.47964
2	9	2016	May	H	17.04	1.13	A	m	48	43.28	0.51	1.17837
2	12	2016	May	H	17.04	1.13	A	m	49	53.15	1.98	3.72531
2	13	2016	May	H	17.04	1.13	A	m	49	45.28	1.92	4.24028
3	1	2016	June	H	20.74	0.84	A	g	56	74.68	3.44	4.60632
3	2	2016	June	H	20.74	0.84	A	g	54	59.89	2.51	4.19102
3	6	2016	June	H	20.74	0.84	A	g	50	52.9	1.13	2.13611
3	7	2016	June	H	20.74	0.84	A	g	53	61.32	2.23	3.63666
3	8	2016	June	H	20.74	0.84	A	g	54	62.72	3.27	5.21365
3	9	2016	June	H	20.74	0.84	A	g	51	52.76	0.58	1.09932
3	10	2016	June	H	20.74	0.84	A	g	51	56.64	2.43	4.29025
3	11	2016	June	H	20.74	0.84	A	g	56	75.05	3.52	4.69021
3	13	2016	June	H	20.74	0.84	A	g	50	50.86	1.05	2.06449
3	19	2016	June	H	20.74	0.84	A	g	50	49.55	3.48	7.02321
3	20	2016	June	H	20.74	0.84	A	g	51	53.54	2.88	5.37916
3	3	2016	June	H	20.74	0.84	A	m	49	58.22	0.91	1.56304
3	4	2016	June	H	20.74	0.84	A	m	49	48.48	0.43	0.886964
3	5	2016	June	H	20.74	0.84	A	m	48	49.29	1.69	3.42869
3	12	2016	June	H	20.74	0.84	A	m	48	44	0.86	1.95455
3	14	2016	June	H	20.74	0.84	A	m	49	49.36	0.51	1.03323
3	15	2016	June	H	20.74	0.84	A	m	49	51.99	2.04	3.92383
3	16	2016	June	H	20.74	0.84	A	m	48	49.08	2.24	4.56398
3	17	2016	June	H	20.74	0.84	A	m	48	44.38	0.87	1.96034
3	18	2016	June	H	20.74	0.84	A	m	49	51.1	2.68	5.24462
3	1	2016	July	H	23.1	0.82	A	g	60	75.28	3.33	4.42349
3	2	2016	July	H	23.1	0.82	A	g	55	64.08	3.87	6.03933
3	3	2016	July	H	23.1	0.82	A	g	55	64.68	3.31	5.1175
3	4	2016	July	H	23.1	0.82	A	g	58	76.86	2.98	3.87718
3	5	2016	July	H	23.1	0.82	A	g	55	65.31	3.28	5.0222
3	6	2016	July	H	23.1	0.82	A	g	57	66.72	2.71	4.06175
3	7	2016	July	H	23.1	0.82	A	g	52	58.77	3.68	6.2617
3	8	2016	July	H	23.1	0.82	A	g	53	67.38	2.6	3.85871
3	9	2016	July	H	23.1	0.82	A	g	53	60.08	2.94	4.89348
3	10	2016	July	H	23.1	0.82	A	g	56	66.34	3.23	4.86886
3	11	2016	July	H	23.1	0.82	A	g	56	71.78	4.51	6.28309
3	12	2016	July	H	23.1	0.82	A	g	60	95.78	4.37	4.56254
3	13	2016	July	H	23.1	0.82	A	g	53	56.83	0.08	0.140771
3	14	2016	July	H	23.1	0.82	A	g	53	64.6	2.45	3.79257
3	15	2016	July	H	23.1	0.82	A	g	54	66.47	4.39	6.60448
3	16	2016	July	H	23.1	0.82	A	g	52	56.62	3.85	6.79972
3	17	2016	July	H	23.1	0.82	A	g	52	57.88	3.72	6.42709
3	18	2016	July	H	23.1	0.82	A	g	51	56.53	2.79	4.93543
3	19	2016	July	H	23.1	0.82	A	g	52	49.88	3.83	7.67843
3	20	2016	July	H	23.1	0.82	A	g	54	62.64	2.84	4.53384
3	1	2016	August	H	23.77	0.74	A	g	51	50.77	2.23	4.39236
3	5	2016	August	H	23.77	0.74	A	g	53	61.86	1.92	3.10378
3	6	2016	August	H	23.77	0.74	A	g	51	53.09	2.25	4.23809
3	7	2016	August	H	23.77	0.74	A	g	50	50.68	2.8	5.52486
3	11	2016	August	H	23.77	0.74	A	g	51	52.55	3.44	6.54615
3	12	2016	August	H	23.77	0.74	A	g	54	65.37	3.67	5.6142
3	13	2016	August	H	23.77	0.74	A	g	53	61.88	3.42	5.52683
3	14	2016	August	H	23.77	0.74	A	g	50	47.72	1.59	3.33194
3	16	2016	August	H	23.77	0.74	A	g	50	55.28	2.1	3.79884
3	18	2016	August	H	23.77	0.74	A	g	56	69.65	7.89	11.3281
3	19	2016	August	H	23.77	0.74	A	g	53	65.32	3.38	5.17453
3	20	2016	August	H	23.77	0.74	A	g	54	65.8	3.54	5.37994
3	2	2016	August	H	23.77	0.74	A	m	49	52.55	2.84	5.40438
3	3	2016	August	H	23.77	0.74	A	m	47	46.36	2.78	5.99655
3	4	2016	August	H	23.77	0.74	A	m	48	50.29	2.22	4.4144
3	8	2016	August	H	23.77	0.74	A	m	47	41.7	0.5	1.19904
3	9	2016	August	H	23.77	0.74	A	m	49	49.34	2.45	4.96555
3	10	2016	August	H	23.77	0.74	A	m	49	48.19	1.33	2.75991
3	15	2016	August	H	23.77	0.74	A	m	48	47.22	1.63	3.45193
3	17	2016	August	H	23.77	0.74	A	m	49	42.65	1.78	4.17351
3	1	2016	September	H	24.14	0.74	A	g	57	73.83	3.83	5.18759
3	2	2016	September	H	24.14	0.74	A	g	51	57.58	3.54	6.14797
3	3	2016	September	H	24.14	0.74	A	g	52	60.38	2.42	4.00795
3	4	2016	September	H	24.14	0.74	A	g	51	52.7	3.23	6.12903
3	5	2016	September	H	24.14	0.74	A	g	56	68.57	1.42	2.07088
3	6	2016	September	H	24.14	0.74	A	g	50	49.39	0.61	1.23507
3	7	2016	September	H	24.14	0.74	A	g	52	55.02	4	7.27008
3	8	2016	September	H	24.14	0.74	A	g	53	49.9	1.92	3.8477
3	9	2016	September	H	24.14	0.74	A	g	52	55.54	2.07	3.72704
3	10	2016	September	H	24.14	0.74	A	g	54	62.24	5.16	8.29049
3	11	2016	September	H	24.14	0.74	A	g	57	76.41	3.27	4.27954
3	12	2016	September	H	24.14	0.74	A	g	54	59.71	2.67	4.47161
3	13	2016	September	H	24.14	0.74	A	g	50	53	3.05	5.75472
3	16	2016	September	H	24.14	0.74	A	g	51	52.71	2.71	5.14134
3	17	2016	September	H	24.14	0.74	A	g	52	58.77	3.22	5.47899
3	18	2016	September	H	24.14	0.74	A	g	55	63.46	3.53	5.56256
3	14	2016	September	H	24.14	0.74	A	m	48	49.29	2.02	4.09819
3	15	2016	September	H	24.14	0.74	A	m	48	48.18	1.57	3.25861
3	19	2016	September	H	24.14	0.74	A	m	46	43.02	1.67	3.88192
3	20	2016	September	H	24.14	0.74	A	m	49	48.51	0.88	1.81406
3	1	2016	October	H	22.01	0.68	A	g	57	75.93	3.75	4.93876
3	2	2016	October	H	22.01	0.68	A	g	50	51.08	3.06	5.9906
3	3	2016	October	H	22.01	0.68	A	g	53	58.2	3.18	5.46392
3	4	2016	October	H	22.01	0.68	A	g	50	48.82	3.34	6.84146
3	6	2016	October	H	22.01	0.68	A	g	50	50.81	1.66	3.26707
3	7	2016	October	H	22.01	0.68	A	g	52	57.05	2.09	3.66345
3	8	2016	October	H	22.01	0.68	A	g	51	55.74	1.97	3.53427
3	15	2016	October	H	22.01	0.68	A	g	52	54.71	1.61	2.94279
3	18	2016	October	H	22.01	0.68	A	g	52	58.56	2.51	4.2862
3	5	2016	October	H	22.01	0.68	A	m	49	48.73	1.69	3.46809
3	9	2016	October	H	22.01	0.68	A	m	49	42.97	0.48	1.11706
3	10	2016	October	H	22.01	0.68	A	m	47	53.7	2.53	4.71136
3	11	2016	October	H	22.01	0.68	A	m	47	42.21	2.85	6.75195
3	12	2016	October	H	22.01	0.68	A	m	46	45.6	1.6	3.50877
3	13	2016	October	H	22.01	0.68	A	m	48	49.28	2.2	4.46429
3	14	2016	October	H	22.01	0.68	A	m	46	43.8	2.17	4.95434
3	16	2016	October	H	22.01	0.68	A	m	47	46.08	0.79	1.71441
3	17	2016	October	H	22.01	0.68	A	m	48	33.8	1.54	4.55621
3	19	2016	October	H	22.01	0.68	A	m	47	44.25	2.07	4.67797
3	20	2016	October	H	22.01	0.68	A	m	47	41.32	1.48	3.5818
3	1	2016	November	H	19.4	1.06	A	g	53	58.44	2.78	4.75702
3	2	2016	November	H	19.4	1.06	A	g	50	49.39	2.56	5.18324
3	3	2016	November	H	19.4	1.06	A	g	55	61.55	0.27	0.438668
3	4	2016	November	H	19.4	1.06	A	g	55	66.01	1.58	2.39358
3	5	2016	November	H	19.4	1.06	A	g	58	63.99	2.4	3.75059
3	6	2016	November	H	19.4	1.06	A	g	50	52.09	2.14	4.10827
3	8	2016	November	H	19.4	1.06	A	g	53	68.58	3.57	5.2056
3	9	2016	November	H	19.4	1.06	A	g	50	50.06	2.26	4.51458
3	10	2016	November	H	19.4	1.06	A	g	50	50.47	1.76	3.48722
3	11	2016	November	H	19.4	1.06	A	g	58	69.31	4.67	6.73784
3	13	2016	November	H	19.4	1.06	A	g	52	55	1.38	2.50909
3	14	2016	November	H	19.4	1.06	A	g	50	51.97	3.03	5.83029
3	16	2016	November	H	19.4	1.06	A	g	60	83.13	4.02	4.8358
3	17	2016	November	H	19.4	1.06	A	g	53	60.62	2.57	4.23952
3	18	2016	November	H	19.4	1.06	A	g	52	55.96	1.98	3.53824
3	19	2016	November	H	19.4	1.06	A	g	52	58.13	1.02	1.75469
3	7	2016	November	H	19.4	1.06	A	m	49	47.28	1.37	2.89763
3	12	2016	November	H	19.4	1.06	A	m	48	46.87	0.79	1.68551
3	15	2016	November	H	19.4	1.06	A	m	48	41.79	0.71	1.69897
3	20	2016	November	H	19.4	1.06	A	m	48	42.45	1.96	4.6172
3	1	2016	December	H	17.59	0.61	A	g	61	90.84	2.53	2.78512
3	2	2016	December	H	17.59	0.61	A	g	54	63.27	1.52	2.4024
3	3	2016	December	H	17.59	0.61	A	g	60	86.26	3.44	3.98794
3	4	2016	December	H	17.59	0.61	A	g	55	69.22	2.06	2.97602
3	6	2016	December	H	17.59	0.61	A	g	52	57.2	1.94	3.39161
3	7	2016	December	H	17.59	0.61	A	g	51	55.52	2.88	5.18732
3	8	2016	December	H	17.59	0.61	A	g	54	67.35	1.41	2.09354
3	9	2016	December	H	17.59	0.61	A	g	54	63.14	2.85	4.51378
3	10	2016	December	H	17.59	0.61	A	g	50	61.32	2.27	3.70189
3	11	2016	December	H	17.59	0.61	A	g	51	59.77	1.93	3.22904
3	12	2016	December	H	17.59	0.61	A	g	56	66.08	3.22	4.87288
3	13	2016	December	H	17.59	0.61	A	g	51	54.57	2.06	3.77497
3	14	2016	December	H	17.59	0.61	A	g	50	55.9	4.1	7.33453
3	15	2016	December	H	17.59	0.61	A	g	53	63.97	4.63	7.23777
3	16	2016	December	H	17.59	0.61	A	g	55	77.39	4.05	5.23323
3	17	2016	December	H	17.59	0.61	A	g	58	80	3.8	4.75
3	18	2016	December	H	17.59	0.61	A	g	55	72.45	2.42	3.34023
3	19	2016	December	H	17.59	0.61	A	g	55	63.85	2.02	3.16366
3	20	2016	December	H	17.59	0.61	A	g	53	57.75	2.13	3.68831
3	1	2017	January	H	15.06	1.49	A	g	58	86.03	3.47	4.03348
3	2	2017	January	H	15.06	1.49	A	g	52	70.05	1.22	1.74161
3	3	2017	January	H	15.06	1.49	A	g	51	51.35	1.33	2.59007
3	4	2017	January	H	15.06	1.49	A	g	54	65.34	0.85	1.30089
3	5	2017	January	H	15.06	1.49	A	g	52	63.82	1.51	2.36603
3	6	2017	January	H	15.06	1.49	A	g	54	69.36	3.93	5.66609
3	7	2017	January	H	15.06	1.49	A	g	50	52.3	1.5	2.86807
3	8	2017	January	H	15.06	1.49	A	g	53	70.94	1.39	1.9594
3	9	2017	January	H	15.06	1.49	A	g	53	60.25	0.49	0.813278
3	10	2017	January	H	15.06	1.49	A	g	50	56.64	1.32	2.33051
3	11	2017	January	H	15.06	1.49	A	g	52	69.78	2.49	3.56836
3	12	2017	January	H	15.06	1.49	A	g	55	71.63	1.18	1.64735
3	13	2017	January	H	15.06	1.49	A	g	52	54.67	2.35	4.29852
3	14	2017	January	H	15.06	1.49	A	g	52	56.29	2.68	4.76106
3	15	2017	January	H	15.06	1.49	A	g	52	58.37	1.93	3.30649
3	17	2017	January	H	15.06	1.49	A	g	50	56.13	2.84	5.05968
3	18	2017	January	H	15.06	1.49	A	g	54	66.47	2.47	3.71596
3	19	2017	January	H	15.06	1.49	A	g	56	71.72	6.32	8.81205
3	20	2017	January	H	15.06	1.49	A	g	59	76.8	1.88	2.44792
3	1	2017	February	H	14.17	1.16	A	g	50	52.48	1.03	1.96265
3	2	2017	February	H	14.17	1.16	A	g	50	48.89	2.69	5.50215
3	4	2017	February	H	14.17	1.16	A	g	51	57.03	0.9	1.57812
3	6	2017	February	H	14.17	1.16	A	g	52	63.74	0.94	1.47474
3	7	2017	February	H	14.17	1.16	A	g	53	58.06	2.25	3.8753
3	9	2017	February	H	14.17	1.16	A	g	55	67.12	1.51	2.2497
3	13	2017	February	H	14.17	1.16	A	g	56	60.32	1.27	2.10544
3	14	2017	February	H	14.17	1.16	A	g	54	63.42	1.81	2.85399
3	15	2017	February	H	14.17	1.16	A	g	56	72.07	2.03	2.81671
3	16	2017	February	H	14.17	1.16	A	g	51	63.9	1.63	2.55086
3	17	2017	February	H	14.17	1.16	A	g	51	52.24	1.06	2.0291
3	19	2017	February	H	14.17	1.16	A	g	55	75.1	2.45	3.26232
3	20	2017	February	H	14.17	1.16	A	g	50	55.83	1.56	2.7942
3	3	2017	February	H	14.17	1.16	A	m	47	43.97	0.43	0.97794
3	5	2017	February	H	14.17	1.16	A	m	49	45.4	1.1	2.42291
3	8	2017	February	H	14.17	1.16	A	m	45	42.15	0.59	1.39976
3	10	2017	February	H	14.17	1.16	A	m	48	48.98	0.86	1.75582
3	11	2017	February	H	14.17	1.16	A	m	48	48.47	1.23	2.53765
3	12	2017	February	H	14.17	1.16	A	m	49	49.59	1.7	3.42811
3	18	2017	February	H	14.17	1.16	A	m	48	47.01	0.61	1.2976
3	1	2017	March	H	14.89	1.03	A	g	53	63.13	2.45	3.88088
3	2	2017	March	H	14.89	1.03	A	g	50	54.79	0.6	1.09509
3	3	2017	March	H	14.89	1.03	A	g	50	49.96	1.83	3.66293
3	4	2017	March	H	14.89	1.03	A	g	53	59.47	1.12	1.8833
3	5	2017	March	H	14.89	1.03	A	g	51	50.16	0.6	1.19617
3	6	2017	March	H	14.89	1.03	A	g	53	70.77	1.36	1.92172
3	7	2017	March	H	14.89	1.03	A	g	50	59.86	0.44	0.735048
3	8	2017	March	H	14.89	1.03	A	g	53	57.33	1.1	1.91872
3	9	2017	March	H	14.89	1.03	A	g	52	67.77	0.41	0.604987
3	11	2017	March	H	14.89	1.03	A	g	52	54.29	1	1.84196
3	13	2017	March	H	14.89	1.03	A	g	53	64.24	1.86	2.89539
3	14	2017	March	H	14.89	1.03	A	g	55	67.14	3.6	5.36193
3	15	2017	March	H	14.89	1.03	A	g	53	61.36	2.66	4.33507
3	16	2017	March	H	14.89	1.03	A	g	58	74.95	4.5	6.004
3	17	2017	March	H	14.89	1.03	A	g	52	60.75	1.59	2.61728
3	18	2017	March	H	14.89	1.03	A	g	57	69.83	0.84	1.20292
3	19	2017	March	H	14.89	1.03	A	g	50	55.18	0.62	1.1236
3	20	2017	March	H	14.89	1.03	A	g	56	55.22	1.09	1.97392
3	10	2017	March	H	14.89	1.03	A	m	49	48.51	0.27	0.556586
3	12	2017	March	H	14.89	1.03	A	m	49	44.37	0.31	0.69867
3	1	2017	April	H	16.39	0.89	A	g	51	55.49	1.07	1.92828
3	2	2017	April	H	16.39	0.89	A	g	53	63.33	2.08	3.28438
3	3	2017	April	H	16.39	0.89	A	g	52	54.8	1.73	3.15693
3	4	2017	April	H	16.39	0.89	A	g	57	75.74	3.2	4.22498
3	5	2017	April	H	16.39	0.89	A	g	57	66.05	0.77	1.16578
3	7	2017	April	H	16.39	0.89	A	g	53	64.74	2	3.08928
3	8	2017	April	H	16.39	0.89	A	g	52	58.6	2.82	4.81229
3	11	2017	April	H	16.39	0.89	A	g	61	91.23	2.78	3.04724
3	12	2017	April	H	16.39	0.89	A	g	55	60.24	0.55	0.913015
3	6	2017	April	H	16.39	0.89	A	m	47	36.16	0.55	1.52102
3	9	2017	April	H	16.39	0.89	A	m	49	50.58	1.24	2.45156
3	10	2017	April	H	16.39	0.89	A	m	44	41.86	0.46	1.0989
3	1	2017	April	H	16.39	0.89	B	g	53	64.56	4.51	6.98575
3	2	2017	April	H	16.39	0.89	B	g	53	64.16	2.76	4.30175
3	3	2017	April	H	16.39	0.89	B	g	63	105.71	2.34	2.2136
3	4	2017	April	H	16.39	0.89	B	g	58	75.96	2.7	3.5545
3	5	2017	April	H	16.39	0.89	B	g	51	49.52	2.98	6.01777
3	6	2017	April	H	16.39	0.89	B	g	58	79.39	1.31	1.65008
3	7	2017	April	H	16.39	0.89	B	g	61	89.94	1.67	1.85679
3	10	2017	April	H	16.39	0.89	B	g	58	82.71	1.28	1.54758
3	11	2017	April	H	16.39	0.89	B	g	51	52.15	1.16	2.22435
3	12	2017	April	H	16.39	0.89	B	g	54	62.27	1.3	2.08768
3	8	2017	April	H	16.39	0.89	B	m	49	42.83	0.78	1.82115
3	9	2017	April	H	16.39	0.89	B	m	47	49.3	1.81	3.6714
3	3	2017	May	H	18.46	0.68	A	g	53	59.34	3.06	5.15672
3	4	2017	May	H	18.46	0.68	A	g	56	81.54	2.44	2.9924
3	6	2017	May	H	18.46	0.68	A	g	50	48.34	1.2	2.48242
3	7	2017	May	H	18.46	0.68	A	g	51	53.73	3.38	6.29071
3	8	2017	May	H	18.46	0.68	A	g	59	77.65	6.48	8.34514
3	9	2017	May	H	18.46	0.68	A	g	51	47.01	1.54	3.2759
3	10	2017	May	H	18.46	0.68	A	g	54	72.71	3.32	4.56608
3	11	2017	May	H	18.46	0.68	A	g	51	51.46	1.16	2.25418
3	12	2017	May	H	18.46	0.68	A	g	52	54.9	1.91	3.47905
3	1	2017	May	H	18.46	0.68	A	m	46	45.21	2.98	6.59146
3	2	2017	May	H	18.46	0.68	A	m	49	49.05	3.23	6.58512
3	5	2017	May	H	18.46	0.68	A	m	48	47.41	0.97	2.04598
3	1	2017	May	H	18.46	0.68	B	g	54	60.23	3.67	6.09331
3	2	2017	May	H	18.46	0.68	B	g	53	60.82	2.75	4.52154
3	4	2017	May	H	18.46	0.68	B	g	50	50.49	1.42	2.81244
3	5	2017	May	H	18.46	0.68	B	g	52	55.39	0.89	1.60679
3	6	2017	May	H	18.46	0.68	B	g	53	53.64	1.96	3.65399
3	7	2017	May	H	18.46	0.68	B	g	51	49.78	2.4	4.82121
3	8	2017	May	H	18.46	0.68	B	g	54	60.53	3.39	5.60053
3	9	2017	May	H	18.46	0.68	B	g	54	65.02	4.63	7.12089
3	10	2017	May	H	18.46	0.68	B	g	53	56.92	2.15	3.77723
3	11	2017	May	H	18.46	0.68	B	g	53	61.41	1.7	2.76828
3	12	2017	May	H	18.46	0.68	B	g	50	59.3	3.36	5.6661
3	3	2017	May	H	18.46	0.68	B	m	48	53.79	1	1.85908
4	1	2017	June	H	22.9	0.57	A	g	53	55.76	0.53	0.950502
4	2	2017	June	H	22.9	0.57	A	g	51	50.44	0.15	0.297383
4	3	2017	June	H	22.9	0.57	A	g	53	60.78	1.28	2.10596
4	4	2017	June	H	22.9	0.57	A	g	55	69.95	2.1	3.00214
4	5	2017	June	H	22.9	0.57	A	g	54	60.77	0.36	0.592398
4	6	2017	June	H	22.9	0.57	A	g	52	53.16	1.3	2.44545
4	7	2017	June	H	22.9	0.57	A	g	57	82.44	1.8	2.18341
4	8	2017	June	H	22.9	0.57	A	g	55	60.73	1.15	1.89363
4	9	2017	June	H	22.9	0.57	A	g	51	49.32	1.02	2.06813
4	10	2017	June	H	22.9	0.57	A	g	54	62.82	0.75	1.19389
4	11	2017	June	H	22.9	0.57	A	g	51	53.86	1.06	1.96807
4	12	2017	June	H	22.9	0.57	A	g	56	63.26	0.56	0.885236
4	1	2017	June	H	22.9	0.57	B	g	58	88.32	2.89	3.27219
4	2	2017	June	H	22.9	0.57	B	g	54	65.87	0.67	1.01716
4	3	2017	June	H	22.9	0.57	B	g	53	61.46	1.95	3.1728
4	4	2017	June	H	22.9	0.57	B	g	51	53.93	0.87	1.6132
4	5	2017	June	H	22.9	0.57	B	g	50	49.14	1.87	3.80545
4	6	2017	June	H	22.9	0.57	B	g	58	74.67	1.38	1.84813
4	7	2017	June	H	22.9	0.57	B	g	51	47.99	0.48	1.00021
4	8	2017	June	H	22.9	0.57	B	g	53	53.01	1.22	2.30145
4	9	2017	June	H	22.9	0.57	B	g	52	63.76	1.45	2.27415
4	10	2017	June	H	22.9	0.57	B	g	50	45.08	1.07	2.37356
4	11	2017	June	H	22.9	0.57	B	g	52	52.1	0.67	1.28599
4	12	2017	June	H	22.9	0.57	B	g	57	77.08	1.93	2.50389
4	1	2017	July	H	24.03	0.91	A	g	52	61.2	0.45	0.735294
4	3	2017	July	H	24.03	0.91	A	g	51	48.83	0.5	1.02396
4	4	2017	July	H	24.03	0.91	A	g	56	75.54	0.71	0.939899
4	5	2017	July	H	24.03	0.91	A	g	57	67.17	2.16	3.21572
4	6	2017	July	H	24.03	0.91	A	g	53	52.82	0.4	0.757289
4	7	2017	July	H	24.03	0.91	A	g	55	52.94	2.12	4.00453
4	8	2017	July	H	24.03	0.91	A	g	55	63.83	0.36	0.563998
4	9	2017	July	H	24.03	0.91	A	g	50	45.87	0.5	1.09004
4	11	2017	July	H	24.03	0.91	A	g	62	98.91	1.34	1.35477
4	2	2017	July	H	24.03	0.91	A	m	45	37.93	0.53	1.39731
4	10	2017	July	H	24.03	0.91	A	m	47	38.58	0.39	1.01089
4	12	2017	July	H	24.03	0.91	A	m	49	37.19	0.47	1.26378
4	1	2017	July	H	24.03	0.91	B	g	57	77.42	0.85	1.09791
4	3	2017	July	H	24.03	0.91	B	g	53	49.56	1.85	3.73285
4	4	2017	July	H	24.03	0.91	B	g	50	49.33	1.21	2.45287
4	7	2017	July	H	24.03	0.91	B	g	53	61.66	1.13	1.83263
4	10	2017	July	H	24.03	0.91	B	g	55	61.64	0.25	0.405581
4	11	2017	July	H	24.03	0.91	B	g	50	44.13	0.9	2.03943
4	2	2017	July	H	24.03	0.91	B	m	47	37.46	0.56	1.49493
4	5	2017	July	H	24.03	0.91	B	m	48	50.21	1.64	3.26628
4	6	2017	July	H	24.03	0.91	B	m	45	26.75	0.01	0.0373832
4	8	2017	July	H	24.03	0.91	B	m	46	36.3	0.55	1.51515
4	9	2017	July	H	24.03	0.91	B	m	48	45.81	1.47	3.20891
4	12	2017	July	H	24.03	0.91	B	m	48	44.8	0.2	0.446429
4	1	2017	September	H	22.95	1.05	A	g	51	49.05	1.88	3.83282
4	2	2017	September	H	22.95	1.05	A	g	53	58.5	2.75	4.70085
4	3	2017	September	H	22.95	1.05	A	g	57	61.89	0.67	1.08257
4	4	2017	September	H	22.95	1.05	A	g	51	48.78	0.43	0.881509
4	5	2017	September	H	22.95	1.05	A	g	51	50.77	0.61	1.2015
4	6	2017	September	H	22.95	1.05	A	g	52	55.16	1.23	2.22988
4	7	2017	September	H	22.95	1.05	A	g	52	52.42	1.18	2.25105
4	9	2017	September	H	22.95	1.05	A	g	55	62.7	1.09	1.73844
4	10	2017	September	H	22.95	1.05	A	g	51	48.62	0.87	1.78939
4	11	2017	September	H	22.95	1.05	A	g	52	57.81	1.22	2.11036
4	12	2017	September	H	22.95	1.05	A	g	50	48.55	2.56	5.27291
4	8	2017	September	H	22.95	1.05	A	m	48	43.35	0.62	1.43022
4	1	2017	September	H	22.95	1.05	B	g	57	62.34	0.85	1.36349
4	3	2017	September	H	22.95	1.05	B	g	58	94.09	2.78	2.95462
4	4	2017	September	H	22.95	1.05	B	g	50	53.04	2.39	4.50603
4	5	2017	September	H	22.95	1.05	B	g	55	76.19	3.4	4.46253
4	6	2017	September	H	22.95	1.05	B	g	51	51.85	2.98	5.74735
4	7	2017	September	H	22.95	1.05	B	g	58	74.62	5.26	7.04905
4	10	2017	September	H	22.95	1.05	B	g	53	62.71	2.46	3.92282
4	11	2017	September	H	22.95	1.05	B	g	58	72.82	2.03	2.7877
4	12	2017	September	H	22.95	1.05	B	g	52	53.61	2.7	5.03637
4	2	2017	September	H	22.95	1.05	B	m	48	44.53	2.46	5.52437
4	8	2017	September	H	22.95	1.05	B	m	48	43.06	1.85	4.29633
4	9	2017	September	H	22.95	1.05	B	m	47	45.23	2.56	5.65996
4	1	2017	October	H	21.43	1.05	A	g	59	60.98	0.74	1.21351
4	2	2017	October	H	21.43	1.05	A	g	54	84.87	3.67	4.32426
4	3	2017	October	H	21.43	1.05	A	g	50	52.89	0.41	0.775194
4	4	2017	October	H	21.43	1.05	A	g	51	63.39	1.07	1.68796
4	5	2017	October	H	21.43	1.05	A	g	58	84.16	0.5	0.594106
4	6	2017	October	H	21.43	1.05	A	g	52	61.74	0.53	0.858439
4	8	2017	October	H	21.43	1.05	A	g	50	58.21	1.49	2.5597
4	9	2017	October	H	21.43	1.05	A	g	54	65.03	1.4	2.15285
4	10	2017	October	H	21.43	1.05	A	g	56	73.79	2.15	2.91367
4	11	2017	October	H	21.43	1.05	A	g	53	63.12	0.95	1.50507
4	12	2017	October	H	21.43	1.05	A	g	53	58.44	1.04	1.7796
4	1	2017	October	H	21.43	1.05	B	g	53	64.63	1.54	2.38279
4	2	2017	October	H	21.43	1.05	B	g	56	78.61	2.02	2.56965
4	3	2017	October	H	21.43	1.05	B	g	53	64.6	2.19	3.39009
4	4	2017	October	H	21.43	1.05	B	g	51	50.25	7.07	14.0697
4	5	2017	October	H	21.43	1.05	B	g	56	58.26	0.24	0.411946
4	6	2017	October	H	21.43	1.05	B	g	55	69.65	1.54	2.21106
4	7	2017	October	H	21.43	1.05	B	g	58	73.04	2.01	2.75192
4	8	2017	October	H	21.43	1.05	B	g	53	55.02	1.39	2.52635
4	9	2017	October	H	21.43	1.05	B	g	51	52.2	1.38	2.64368
4	10	2017	October	H	21.43	1.05	B	g	52	54.05	2.85	5.2729
4	11	2017	October	H	21.43	1.05	B	g	54	60.22	1.89	3.13849
4	12	2017	October	H	21.43	1.05	B	g	56	69.61	2.62	3.76383
4	1	2017	November	H	18.03	1.57	A	g	56	76.44	2.11	2.76033
4	2	2017	November	H	18.03	1.57	A	g	54	56.49	0.68	1.20375
4	3	2017	November	H	18.03	1.57	A	g	54	60.09	0.88	1.46447
4	4	2017	November	H	18.03	1.57	A	g	55	70.06	1.97	2.81188
4	5	2017	November	H	18.03	1.57	A	g	53	66.37	0.91	1.3711
4	6	2017	November	H	18.03	1.57	A	g	56	68.09	3.35	4.91996
4	7	2017	November	H	18.03	1.57	A	g	54	65.32	1.52	2.32701
4	8	2017	November	H	18.03	1.57	A	g	53	58.16	1	1.71939
4	9	2017	November	H	18.03	1.57	A	g	52	58.94	1.9	3.22362
4	10	2017	November	H	18.03	1.57	A	g	52	42.76	1.17	2.7362
4	11	2017	November	H	18.03	1.57	A	g	51	54.25	1.46	2.69124
4	12	2017	November	H	18.03	1.57	A	g	50	55.69	1.23	2.20866
4	3	2017	November	H	18.03	1.57	B	g	54	70.47	2.28	3.23542
4	4	2017	November	H	18.03	1.57	B	g	50	48.97	0.41	0.837247
4	5	2017	November	H	18.03	1.57	B	g	50	55.22	0.42	0.760594
4	6	2017	November	H	18.03	1.57	B	g	58	54.13	0.07	0.129318
4	7	2017	November	H	18.03	1.57	B	g	55	70.66	2.18	3.0852
4	8	2017	November	H	18.03	1.57	B	g	59	85.11	0.84	0.986958
4	9	2017	November	H	18.03	1.57	B	g	52	52.42	0.65	1.23998
4	12	2017	November	H	18.03	1.57	B	g	57	75.77	0.82	1.08222
4	1	2017	November	H	18.03	1.57	B	m	45	47.17	1.17	2.48039
4	2	2017	November	H	18.03	1.57	B	m	47	47.95	1.69	3.5245
4	10	2017	November	H	18.03	1.57	B	m	48	53.24	1.3	2.44177
4	11	2017	November	H	18.03	1.57	B	m	48	50.75	1.65	3.25123
4	1	2017	December	H	14.88	1.89	A	g	56	74.27	2.75	3.70271
4	2	2017	December	H	14.88	1.89	A	g	53	63.22	1.61	2.54666
4	3	2017	December	H	14.88	1.89	A	g	58	79.76	3.28	4.11234
4	4	2017	December	H	14.88	1.89	A	g	58	84.16	0.47	0.55846
4	5	2017	December	H	14.88	1.89	A	g	56	69.29	0.54	0.779333
4	6	2017	December	H	14.88	1.89	A	g	56	74.23	2.37	3.19278
4	7	2017	December	H	14.88	1.89	A	g	55	69.75	1.31	1.87814
4	8	2017	December	H	14.88	1.89	A	g	50	53.77	1.14	2.12014
4	9	2017	December	H	14.88	1.89	A	g	55	71.71	1.99	2.77507
4	10	2017	December	H	14.88	1.89	A	g	55	71.21	1.79	2.51369
4	11	2017	December	H	14.88	1.89	A	g	58	73.69	0.6	0.814222
4	12	2017	December	H	14.88	1.89	A	g	58	79	2.29	2.89873
4	1	2017	December	H	14.88	1.89	B	g	52	57.87	2.91	5.02851
4	2	2017	December	H	14.88	1.89	B	g	50	49.02	0.94	1.91758
4	4	2017	December	H	14.88	1.89	B	g	52	50.34	1.3	2.58244
4	10	2017	December	H	14.88	1.89	B	g	51	46.63	0.47	1.00793
4	3	2017	December	H	14.88	1.89	B	m	49	45.95	1.07	2.32862
4	5	2017	December	H	14.88	1.89	B	m	49	48.06	1.17	2.43446
4	6	2017	December	H	14.88	1.89	B	m	49	42	0.8	1.90476
4	7	2017	December	H	14.88	1.89	B	m	46	37.76	1.64	4.34322
4	8	2017	December	H	14.88	1.89	B	m	49	46.94	1.35	2.87601
4	9	2017	December	H	14.88	1.89	B	m	46	43.33	0.42	0.969305
4	11	2017	December	H	14.88	1.89	B	m	45	35.27	0.26	0.73717
4	12	2017	December	H	14.88	1.89	B	m	45	38.37	0.89	2.31952
4	1	2018	January	H	14.25	1.59	A	g	60	82.96	3.83	4.61668
4	2	2018	January	H	14.25	1.59	A	g	55	62.16	1.8	2.89575
4	3	2018	January	H	14.25	1.59	A	g	60	80.99	2.2	2.71638
4	4	2018	January	H	14.25	1.59	A	g	56	68.36	3.1	4.53482
4	5	2018	January	H	14.25	1.59	A	g	55	63.58	1.64	2.57943
4	6	2018	January	H	14.25	1.59	A	g	54	63.18	0.37	0.585628
4	7	2018	January	H	14.25	1.59	A	g	60	90.76	1.73	1.90613
4	8	2018	January	H	14.25	1.59	A	g	58	77.5	1.17	1.50968
4	9	2018	January	H	14.25	1.59	A	g	55	65.98	3.86	5.85026
4	10	2018	January	H	14.25	1.59	A	g	52	65.89	4.06	6.16178
4	11	2018	January	H	14.25	1.59	A	g	54	60.72	1.79	2.94796
4	12	2018	January	H	14.25	1.59	A	g	55	74.85	3.56	4.75618
4	1	2018	January	H	14.25	1.59	B	g	50	57.63	1.75	3.03661
4	2	2018	January	H	14.25	1.59	B	g	50	55.6	0.87	1.56475
4	3	2018	January	H	14.25	1.59	B	g	50	49.27	0.18	0.365334
4	4	2018	January	H	14.25	1.59	B	g	55	67.01	0.36	0.537233
4	5	2018	January	H	14.25	1.59	B	g	57	70.58	2.47	3.49957
4	6	2018	January	H	14.25	1.59	B	g	56	70.67	1.91	2.7027
4	7	2018	January	H	14.25	1.59	B	g	52	59.73	1.43	2.39411
4	8	2018	January	H	14.25	1.59	B	g	52	55.36	1	1.80636
4	9	2018	January	H	14.25	1.59	B	g	54	67.58	2.12	3.13702
4	10	2018	January	H	14.25	1.59	B	g	56	82.16	1.76	2.14216
4	11	2018	January	H	14.25	1.59	B	g	58	77.72	0.75	0.965003
4	12	2018	January	H	14.25	1.59	B	g	55	54.1	1.81	3.34566
4	2	2018	March	H	13.63	1.78	A	g	52	49.59	2.65	5.34382
4	5	2018	March	H	13.63	1.78	A	g	51	52.58	2.93	5.57246
4	6	2018	March	H	13.63	1.78	A	g	52	50.48	2.8	5.54675
4	8	2018	March	H	13.63	1.78	A	g	50	52.78	4.26	8.07124
4	9	2018	March	H	13.63	1.78	A	g	50	53.63	1.55	2.89017
4	1	2018	March	H	13.63	1.78	A	m	49	45.44	1.52	3.34507
4	3	2018	March	H	13.63	1.78	A	m	46	45.43	2.44	5.3709
4	4	2018	March	H	13.63	1.78	A	m	49	48.16	1.84	3.8206
4	7	2018	March	H	13.63	1.78	A	m	48	47.52	1.65	3.47222
4	10	2018	March	H	13.63	1.78	A	m	48	48.54	3.06	6.30408
4	11	2018	March	H	13.63	1.78	A	m	48	43.76	1.13	2.58227
4	12	2018	March	H	13.63	1.78	A	m	46	43.09	2.51	5.82502
4	10	2018	March	H	13.63	1.78	B	g	50	50.76	2.27	4.47203
4	11	2018	March	H	13.63	1.78	B	g	50	49.83	2.72	5.45856
4	1	2018	March	H	13.63	1.78	B	m	49	49.58	1.52	3.06575
4	2	2018	March	H	13.63	1.78	B	m	45	37.83	2.65	7.00502
4	3	2018	March	H	13.63	1.78	B	m	48	48.79	2.44	5.00102
4	4	2018	March	H	13.63	1.78	B	m	47	39.1	1.84	4.70588
4	5	2018	March	H	13.63	1.78	B	m	49	51.94	2.93	5.64112
4	6	2018	March	H	13.63	1.78	B	m	47	43.21	2.8	6.47998
4	7	2018	March	H	13.63	1.78	B	m	47	46.13	1.81	3.92369
4	8	2018	March	H	13.63	1.78	B	m	46	41.71	1.91	4.57924
4	9	2018	March	H	13.63	1.78	B	m	48	45.89	1.63	3.55197
4	12	2018	March	H	13.63	1.78	B	m	48	47.15	1.58	3.35101
4	3	2018	April	H	15.74	0.83	A	g	50	53.43	0.75	1.40371
4	4	2018	April	H	15.74	0.83	A	g	54	61.64	2.96	4.80208
4	7	2018	April	H	15.74	0.83	A	g	54	61.16	2.8	4.57816
4	8	2018	April	H	15.74	0.83	A	g	58	83.59	2.32	2.77545
4	9	2018	April	H	15.74	0.83	A	g	54	61.47	2.26	3.67659
4	10	2018	April	H	15.74	0.83	A	g	51	48.27	2.21	4.57841
4	11	2018	April	H	15.74	0.83	A	g	54	57.08	1.95	3.41626
4	12	2018	April	H	15.74	0.83	A	g	56	77.33	1.24	1.60352
4	1	2018	April	H	15.74	0.83	A	m	46	40.9	1.06	2.59169
4	2	2018	April	H	15.74	0.83	A	m	47	43.01	1.65	3.83632
4	5	2018	April	H	15.74	0.83	A	m	48	50.87	1.99	3.91193
4	6	2018	April	H	15.74	0.83	A	m	49	47.57	0.91	1.91297
4	1	2018	April	H	15.74	0.83	B	g	50	57.46	4.8	8.35364
4	2	2018	April	H	15.74	0.83	B	g	54	61.6	2.45	3.97727
4	3	2018	April	H	15.74	0.83	B	g	55	61.48	3.26	5.30254
4	4	2018	April	H	15.74	0.83	B	g	55	60.3	2.52	4.1791
4	5	2018	April	H	15.74	0.83	B	g	53	54.49	0.25	0.4588
4	6	2018	April	H	15.74	0.83	B	g	60	75.81	3.7	4.88062
4	7	2018	April	H	15.74	0.83	B	g	50	52.96	1.97	3.71979
4	8	2018	April	H	15.74	0.83	B	g	51	60.89	1.66	2.72623
4	11	2018	April	H	15.74	0.83	B	g	52	58.19	2.81	4.82901
4	12	2018	April	H	15.74	0.83	B	g	51	54.7	2.93	5.35649
4	9	2018	April	H	15.74	0.83	B	m	47	46.57	2.02	4.33756
4	10	2018	April	H	15.74	0.83	B	m	48	45.19	0.94	2.08011
4	1	2018	May	H	17.65	0.81	A	g	53	73.5	0.91	1.2381
4	6	2018	May	H	17.65	0.81	A	g	50	54.7	1.51	2.76051
4	7	2018	May	H	17.65	0.81	A	g	52	62.9	0.47	0.747218
4	8	2018	May	H	17.65	0.81	A	g	53	56.17	1.17	2.08296
4	9	2018	May	H	17.65	0.81	A	g	50	51.4	2.22	4.31907
4	11	2018	May	H	17.65	0.81	A	g	54	66.23	0.4	0.603956
4	2	2018	May	H	17.65	0.81	A	m	46	48.97	0.14	0.285889
4	3	2018	May	H	17.65	0.81	A	m	48	43.68	0.46	1.05311
4	4	2018	May	H	17.65	0.81	A	m	49	56.27	1.04	1.84823
4	5	2018	May	H	17.65	0.81	A	m	45	37.65	0.17	0.451527
4	10	2018	May	H	17.65	0.81	A	m	46	47.12	0.36	0.764007
4	12	2018	May	H	17.65	0.81	A	m	47	44.17	0.09	0.203758
4	1	2018	May	H	17.65	0.81	B	g	56	75.93	2.48	3.26617
4	4	2018	May	H	17.65	0.81	B	g	50	51.55	0.6	1.16392
4	6	2018	May	H	17.65	0.81	B	g	51	60.76	2.52	4.14747
4	7	2018	May	H	17.65	0.81	B	g	51	50.66	0.53	1.04619
4	8	2018	May	H	17.65	0.81	B	g	51	61.83	2.96	4.78732
4	10	2018	May	H	17.65	0.81	B	g	52	59.9	4.79	7.99666
4	2	2018	May	H	17.65	0.81	B	m	46	46.9	1.59	3.39019
4	3	2018	May	H	17.65	0.81	B	m	48	54	2.04	3.77778
4	5	2018	May	H	17.65	0.81	B	m	49	50.42	0.59	1.17017
4	9	2018	May	H	17.65	0.81	B	m	43	33.46	0.12	0.358637
4	11	2018	May	H	17.65	0.81	B	m	47	43.53	2.23	5.1229
4	12	2018	May	H	17.65	0.81	B	m	44	35.59	1.02	2.86597
5	2	2018	June	H	21.65	0.72	A	g	53	59.19	0.49	0.827843
5	3	2018	June	H	21.65	0.72	A	g	50	51.26	0.49	0.955911
5	5	2018	June	H	21.65	0.72	A	g	53	62.53	0.39	0.623701
5	6	2018	June	H	21.65	0.72	A	g	50	54.15	1.16	2.1422
5	8	2018	June	H	21.65	0.72	A	g	50	49.35	0.87	1.76292
5	1	2018	June	H	21.65	0.72	A	m	48	46.91	0.52	1.10851
5	4	2018	June	H	21.65	0.72	A	m	45	48.08	0.8	1.66389
5	7	2018	June	H	21.65	0.72	A	m	47	40.25	0.25	0.621118
5	9	2018	June	H	21.65	0.72	A	m	45	37.27	0.23	0.617118
5	10	2018	June	H	21.65	0.72	A	m	46	36.57	0.61	1.66803
5	11	2018	June	H	21.65	0.72	A	m	48	48.33	1.14	2.35878
5	12	2018	June	H	21.65	0.72	A	m	42	32.45	0.13	0.400616
5	3	2018	June	H	21.65	0.72	B	g	53	65.02	0.65	0.999692
5	4	2018	June	H	21.65	0.72	B	g	52	60.43	0.47	0.777759
5	5	2018	June	H	21.65	0.72	B	g	52	56.68	3.33	5.87509
5	6	2018	June	H	21.65	0.72	B	g	54	62.72	0.39	0.621811
5	9	2018	June	H	21.65	0.72	B	g	55	64.94	1.97	3.03357
5	11	2018	June	H	21.65	0.72	B	g	52	60.84	0.83	1.36423
5	1	2018	June	H	21.65	0.72	B	m	48	50.47	0.72	1.42659
5	2	2018	June	H	21.65	0.72	B	m	46	45.73	0.61	1.33392
5	7	2018	June	H	21.65	0.72	B	m	47	43.16	0.83	1.92308
5	8	2018	June	H	21.65	0.72	B	m	49	51.23	0.42	0.819832
5	10	2018	June	H	21.65	0.72	B	m	48	47.96	1.25	2.60634
5	12	2018	June	H	21.65	0.72	B	m	45	43.82	0.72	1.64309
5	1	2018	July	H	25.3	0.62	A	g	53	60.79	2.19	3.60257
5	3	2018	July	H	25.3	0.62	A	g	63	84.9	2.11	2.48528
5	5	2018	July	H	25.3	0.62	A	g	51	50.87	0.54	1.06153
5	6	2018	July	H	25.3	0.62	A	g	50	52.23	0.66	1.26364
5	7	2018	July	H	25.3	0.62	A	g	55	74.03	2.47	3.33649
5	8	2018	July	H	25.3	0.62	A	g	60	87.67	1.68	1.91628
5	9	2018	July	H	25.3	0.62	A	g	63	63.23	3.75	5.93073
5	10	2018	July	H	25.3	0.62	A	g	57	81.27	3.74	4.60194
5	2	2018	July	H	25.3	0.62	A	m	46	38.09	0.49	1.28643
5	4	2018	July	H	25.3	0.62	A	m	47	41.01	0.41	0.999756
5	11	2018	July	H	25.3	0.62	A	m	46	38.87	1.01	2.5984
5	12	2018	July	H	25.3	0.62	A	m	48	54.95	0.29	0.527753
5	1	2018	July	H	25.3	0.62	B	g	50	47.08	0.89	1.8904
5	3	2018	July	H	25.3	0.62	B	g	54	60.33	1.73	2.86756
5	4	2018	July	H	25.3	0.62	B	g	53	64.78	2.01	3.10281
5	5	2018	July	H	25.3	0.62	B	g	52	60.09	2.3	3.82759
5	6	2018	July	H	25.3	0.62	B	g	52	60.99	2.33	3.8203
5	7	2018	July	H	25.3	0.62	B	g	50	51.11	2.11	4.12835
5	8	2018	July	H	25.3	0.62	B	g	53	68.95	0.56	0.812183
5	9	2018	July	H	25.3	0.62	B	g	51	52.52	0.74	1.40899
5	10	2018	July	H	25.3	0.62	B	g	50	45.9	0.84	1.83007
5	11	2018	July	H	25.3	0.62	B	g	53	56.29	0.57	1.01261
5	2	2018	July	H	25.3	0.62	B	m	47	39.15	0.31	0.791826
5	12	2018	July	H	25.3	0.62	B	m	48	52.51	0.77	1.46639
5	2	2018	August	H	26.15	0.61	A	g	53	54.11	0.33	0.609869
5	4	2018	August	H	26.15	0.61	A	g	51	60.49	0.65	1.07456
5	7	2018	August	H	26.15	0.61	A	g	52	65.8	0.87	1.32219
5	9	2018	August	H	26.15	0.61	A	g	50	52.25	0.27	0.516746
5	12	2018	August	H	26.15	0.61	A	g	51	61.74	0.51	0.826045
5	1	2018	August	H	26.15	0.61	A	m	47	48.55	0.74	1.5242
5	3	2018	August	H	26.15	0.61	A	m	47	42.09	0.22	0.522689
5	5	2018	August	H	26.15	0.61	A	m	46	39.17	0.1	0.255297
5	6	2018	August	H	26.15	0.61	A	m	48	45.21	1.07	2.36673
5	8	2018	August	H	26.15	0.61	A	m	45	41.66	0.32	0.768123
5	10	2018	August	H	26.15	0.61	A	m	47	42.73	0.7	1.63819
5	11	2018	August	H	26.15	0.61	A	m	49	59.69	1.2	2.01039
5	2	2018	August	H	26.15	0.61	B	g	54	62.7	0.34	0.542265
5	5	2018	August	H	26.15	0.61	B	g	50	58.28	0.78	1.33837
5	1	2018	August	H	26.15	0.61	B	m	48	55.32	0.09	0.16269
5	3	2018	August	H	26.15	0.61	B	m	46	45.11	0.42	0.931057
5	4	2018	August	H	26.15	0.61	B	m	48	49.55	0.37	0.74672
5	6	2018	August	H	26.15	0.61	B	m	44	46.14	0.4	0.866927
5	7	2018	August	H	26.15	0.61	B	m	46	47.58	0.2	0.420345
5	8	2018	August	H	26.15	0.61	B	m	44	40.96	0.26	0.634766
5	9	2018	August	H	26.15	0.61	B	m	48	49.18	1.13	2.29768
5	10	2018	August	H	26.15	0.61	B	m	44	43.97	0.1	0.227428
5	11	2018	August	H	26.15	0.61	B	m	48	49.89	0.45	0.901984
5	12	2018	August	H	26.15	0.61	B	m	47	44	0.14	0.318182
5	4	2018	September	H	24.84	0.59	A	g	58	71.73	1.77	2.46759
5	6	2018	September	H	24.84	0.59	A	g	53	57.4	1.05	1.82927
5	8	2018	September	H	24.84	0.59	A	g	52	58.11	0.5	0.860437
5	10	2018	September	H	24.84	0.59	A	g	50	51.99	0.42	0.807848
5	11	2018	September	H	24.84	0.59	A	g	53	57.1	1.08	1.89142
5	12	2018	September	H	24.84	0.59	A	g	51	58.56	1.67	2.85178
5	1	2018	September	H	24.84	0.59	A	m	48	43.11	0.07	0.162375
5	2	2018	September	H	24.84	0.59	A	m	49	45.71	1.18	2.58149
5	3	2018	September	H	24.84	0.59	A	m	48	49.63	0.13	0.261938
5	5	2018	September	H	24.84	0.59	A	m	49	47.44	0.13	0.27403
5	7	2018	September	H	24.84	0.59	A	m	49	51.33	0.88	1.7144
5	9	2018	September	H	24.84	0.59	A	m	49	50.98	0.16	0.313849
5	1	2018	September	H	24.84	0.59	B	g	50	51.54	0.63	1.22235
5	3	2018	September	H	24.84	0.59	B	g	56	74.74	0.93	1.24431
5	4	2018	September	H	24.84	0.59	B	g	57	69.06	1.11	1.6073
5	5	2018	September	H	24.84	0.59	B	g	54	56.12	0.38	0.67712
5	7	2018	September	H	24.84	0.59	B	g	52	58.67	0.33	0.562468
5	8	2018	September	H	24.84	0.59	B	g	53	61.36	0.34	0.554107
5	9	2018	September	H	24.84	0.59	B	g	54	58.87	1.15	1.95346
5	10	2018	September	H	24.84	0.59	B	g	54	64.21	2.29	3.56642
5	11	2018	September	H	24.84	0.59	B	g	50	52.5	0.93	1.77143
5	12	2018	September	H	24.84	0.59	B	g	51	48.95	1.26	2.57406
5	2	2018	September	H	24.84	0.59	B	m	47	41.64	0.37	0.888569
5	6	2018	September	H	24.84	0.59	B	m	49	53.39	1.32	2.47237
5	2	2018	October	H	21.9	1.01	A	g	58	75.85	2.06	2.71589
5	4	2018	October	H	21.9	1.01	A	g	53	68.37	0.31	0.453415
5	5	2018	October	H	21.9	1.01	A	g	52	61.43	0.49	0.797656
5	6	2018	October	H	21.9	1.01	A	g	52	65.49	1.24	1.89342
5	7	2018	October	H	21.9	1.01	A	g	52	56.51	1.51	2.67209
5	9	2018	October	H	21.9	1.01	A	g	50	47.73	0.94	1.96941
5	12	2018	October	H	21.9	1.01	A	g	51	46.48	0.4	0.860585
5	1	2018	October	H	21.9	1.01	A	m	48	46.09	0.41	0.889564
5	3	2018	October	H	21.9	1.01	A	m	47	48.21	2.27	4.70857
5	8	2018	October	H	21.9	1.01	A	m	49	40.32	0.57	1.41369
5	10	2018	October	H	21.9	1.01	A	m	48	45.86	0.16	0.348888
5	11	2018	October	H	21.9	1.01	A	m	47	41.31	0.29	0.702009
5	4	2018	October	H	21.9	1.01	B	g	53	59.06	0.73	1.23603
5	8	2018	October	H	21.9	1.01	B	g	54	63.09	1.51	2.39341
5	9	2018	October	H	21.9	1.01	B	g	50	51.5	0.12	0.23301
5	11	2018	October	H	21.9	1.01	B	g	53	56.82	0.17	0.29919
5	12	2018	October	H	21.9	1.01	B	g	51	54.21	0.53	0.977679
5	1	2018	October	H	21.9	1.01	B	m	48	44.57	0.48	1.07696
5	2	2018	October	H	21.9	1.01	B	m	48	45.41	0.78	1.71768
5	3	2018	October	H	21.9	1.01	B	m	47	43.31	0.59	1.36227
5	5	2018	October	H	21.9	1.01	B	m	49	50.09	0.59	1.17788
5	6	2018	October	H	21.9	1.01	B	m	46	37.82	0.34	0.898995
5	7	2018	October	H	21.9	1.01	B	m	49	47.4	0.26	0.548523
5	10	2018	October	H	21.9	1.01	B	m	49	46.1	0.56	1.21475
5	1	2018	December	H	15.19	1.39	A	g	57	87.72	1.5	1.70999
5	2	2018	December	H	15.19	1.39	A	g	56	71.15	4.16	5.8468
5	10	2018	December	H	15.19	1.39	A	g	50	58.91	0.27	0.458326
5	3	2018	December	H	15.19	1.39	A	m	48	43.24	0.54	1.24884
5	4	2018	December	H	15.19	1.39	A	m	47	44.66	0.47	1.0524
5	5	2018	December	H	15.19	1.39	A	m	48	47.5	0.33	0.694737
5	6	2018	December	H	15.19	1.39	A	m	49	48.34	0.27	0.558544
5	7	2018	December	H	15.19	1.39	A	m	47	41.21	1.14	2.76632
5	8	2018	December	H	15.19	1.39	A	m	48	49.83	1.28	2.56873
5	9	2018	December	H	15.19	1.39	A	m	48	44.56	0.39	0.875224
5	11	2018	December	H	15.19	1.39	A	m	42	33.3	0.05	0.15015
5	12	2018	December	H	15.19	1.39	A	m	39	28.45	0.66	2.31986
5	13	2018	December	H	15.19	1.39	A	m	39	28.54	0.29	1.01612
5	14	2018	December	H	15.19	1.39	A	m	36	19.9	0.04	0.201005
5	2	2018	December	H	15.19	1.39	B	g	50	55.72	1.27	2.27925
5	3	2018	December	H	15.19	1.39	B	g	50	50.8	0.96	1.88976
5	5	2018	December	H	15.19	1.39	B	g	53	61.61	1.7	2.75929
5	7	2018	December	H	15.19	1.39	B	g	50	53	0.18	0.339623
5	1	2018	December	H	15.19	1.39	B	m	45	46.93	1.76	3.75027
5	4	2018	December	H	15.19	1.39	B	m	47	45.52	1.74	3.8225
5	6	2018	December	H	15.19	1.39	B	m	48	53.86	1.06	1.96807
5	8	2018	December	H	15.19	1.39	B	m	45	38.3	0.64	1.67102
5	9	2018	December	H	15.19	1.39	B	m	44	37.7	0.15	0.397878
5	10	2018	December	H	15.19	1.39	B	m	45	36.93	0.04	0.108313
5	11	2018	December	H	15.19	1.39	B	m	43	35.37	0.85	2.40317
5	12	2018	December	H	15.19	1.39	B	m	39	24.66	0.04	0.162206
5	13	2018	December	H	15.19	1.39	B	m	38	24.54	0.03	0.122249
5	14	2018	December	H	15.19	1.39	B	m	40	28.7	0.07	0.243902
5	15	2018	December	H	15.19	1.39	B	m	43	35.78	1.13	3.15819
5	1	2019	February	H	13.57	1.12	A	g	56	60.88	1.78	2.92378
5	2	2019	February	H	13.57	1.12	A	g	53	61.93	2.8	4.52123
5	3	2019	February	H	13.57	1.12	A	g	54	62.9	4.48	7.12242
5	4	2019	February	H	13.57	1.12	A	g	54	60.44	3.51	5.80741
5	5	2019	February	H	13.57	1.12	A	g	52	57.94	3.32	5.73007
5	6	2019	February	H	13.57	1.12	A	g	54	62.42	1.58	2.53124
5	7	2019	February	H	13.57	1.12	A	g	53	60.27	3.58	5.93994
5	8	2019	February	H	13.57	1.12	A	g	55	69.91	1.43	2.04549
5	9	2019	February	H	13.57	1.12	A	g	50	50.71	1.07	2.11004
5	10	2019	February	H	13.57	1.12	A	g	50	59.69	2.34	3.92025
5	11	2019	February	H	13.57	1.12	A	g	50	53.26	1.51	2.83515
5	1	2019	February	H	13.57	1.12	A	m	47	46.12	0.92	1.9948
5	2	2019	February	H	13.57	1.12	A	m	42	32.74	0.88	2.68784
5	3	2019	February	H	13.57	1.12	A	m	44	34.33	0.79	2.30119
5	4	2019	February	H	13.57	1.12	A	m	46	41.2	1.17	2.83981
5	5	2019	February	H	13.57	1.12	A	m	48	48.3	2.02	4.18219
5	6	2019	February	H	13.57	1.12	A	m	48	47.49	1.8	3.79027
5	7	2019	February	H	13.57	1.12	A	m	49	53.99	0.42	0.777922
5	8	2019	February	H	13.57	1.12	A	m	49	52.32	2.83	5.40902
5	9	2019	February	H	13.57	1.12	A	m	45	39.96	1.63	4.07908
5	1	2019	February	H	13.57	1.12	B	g	56	74.12	2.71	3.65623
5	2	2019	February	H	13.57	1.12	B	g	57	83.65	3.82	4.56665
5	3	2019	February	H	13.57	1.12	B	g	55	68.61	6.38	9.29894
5	4	2019	February	H	13.57	1.12	B	g	52	53.89	2.18	4.04528
5	5	2019	February	H	13.57	1.12	B	g	52	63.51	1.41	2.22012
5	6	2019	February	H	13.57	1.12	B	g	53	59.66	1.25	2.09521
5	7	2019	February	H	13.57	1.12	B	g	50	52.63	2.11	4.00912
5	8	2019	February	H	13.57	1.12	B	g	51	61.29	1.64	2.6758
5	1	2019	February	H	13.57	1.12	B	m	48	53.77	1.68	3.12442
5	2	2019	February	H	13.57	1.12	B	m	48	51.63	2.92	5.65563
5	3	2019	February	H	13.57	1.12	B	m	49	48.88	2	4.09165
5	4	2019	February	H	13.57	1.12	B	m	47	49.25	3.56	7.22843
5	5	2019	February	H	13.57	1.12	B	m	46	43.66	1.5	3.43564
5	6	2019	February	H	13.57	1.12	B	m	47	47.06	1.22	2.59244
5	7	2019	February	H	13.57	1.12	B	m	48	47.35	3.51	7.41288
5	8	2019	February	H	13.57	1.12	B	m	48	48.34	2.36	4.88209
5	9	2019	February	H	13.57	1.12	B	m	46	40.12	1.21	3.01595
5	10	2019	February	H	13.57	1.12	B	m	46	39.19	1.4	3.57234
5	11	2019	February	H	13.57	1.12	B	m	47	42.25	1.5	3.5503
5	12	2019	February	H	13.57	1.12	B	m	45	40.84	1.88	4.60333
5	1	2019	March	H	13.98	1.3	A	g	56	73.22	4.62	6.30975
5	2	2019	March	H	13.98	1.3	A	g	56	70.93	2.32	3.27083
5	3	2019	March	H	13.98	1.3	A	g	50	51.06	3.86	7.55973
5	4	2019	March	H	13.98	1.3	A	g	50	57.3	4.76	8.30716
5	5	2019	March	H	13.98	1.3	A	g	57	75.8	4.73	6.24011
5	6	2019	March	H	13.98	1.3	A	g	55	78.48	4.6	5.86137
5	7	2019	March	H	13.98	1.3	A	g	53	61.98	3.03	4.88867
5	8	2019	March	H	13.98	1.3	A	g	55	67.61	6.93	10.25
5	9	2019	March	H	13.98	1.3	A	g	51	57.7	3.28	5.68458
5	10	2019	March	H	13.98	1.3	A	g	52	61.45	3.18	5.17494
5	1	2019	March	H	13.98	1.3	A	m	43	34.15	1.63	4.77306
5	2	2019	March	H	13.98	1.3	A	m	44	34.16	0.92	2.69321
5	3	2019	March	H	13.98	1.3	A	m	43	30.73	1.65	5.36935
5	4	2019	March	H	13.98	1.3	A	m	45	40.9	1.78	4.35208
5	5	2019	March	H	13.98	1.3	A	m	44	37.62	2	5.31632
5	6	2019	March	H	13.98	1.3	A	m	47	44.61	1.96	4.39363
5	7	2019	March	H	13.98	1.3	A	m	44	37.45	3.2	8.54473
5	8	2019	March	H	13.98	1.3	A	m	48	42.04	2.87	6.82683
5	9	2019	March	H	13.98	1.3	A	m	47	45.09	2.78	6.16545
5	10	2019	March	H	13.98	1.3	A	m	46	37.1	2.29	6.17251
5	1	2019	March	H	13.98	1.3	B	g	53	63.45	6.9	10.8747
5	2	2019	March	H	13.98	1.3	B	g	51	64.69	3.88	5.99784
5	3	2019	March	H	13.98	1.3	B	g	52	51.62	4.67	9.04688
5	4	2019	March	H	13.98	1.3	B	g	55	66.53	3.98	5.98226
5	5	2019	March	H	13.98	1.3	B	g	50	59.34	5.7	9.60566
5	6	2019	March	H	13.98	1.3	B	g	51	57.04	3.57	6.25877
5	7	2019	March	H	13.98	1.3	B	g	50	51.92	3.7	7.12635
5	8	2019	March	H	13.98	1.3	B	g	52	50.51	3.73	7.38468
5	9	2019	March	H	13.98	1.3	B	g	50	46.59	4.1	8.80017
5	10	2019	March	H	13.98	1.3	B	g	50	50.2	3.44	6.85259
5	1	2019	March	H	13.98	1.3	B	m	42	29.21	1.4	4.79288
5	2	2019	March	H	13.98	1.3	B	m	41	30.45	1.82	5.97701
5	3	2019	March	H	13.98	1.3	B	m	46	46.32	1.6	3.45423
5	4	2019	March	H	13.98	1.3	B	m	42	33.62	1.58	4.69958
5	5	2019	March	H	13.98	1.3	B	m	42	30.88	1.74	5.63472
5	6	2019	March	H	13.98	1.3	B	m	44	42.77	1.82	4.25532
5	7	2019	March	H	13.98	1.3	B	m	40	26.86	0.62	2.30827
5	8	2019	March	H	13.98	1.3	B	m	49	52.91	2.97	5.61331
5	9	2019	March	H	13.98	1.3	B	m	48	48.79	4.65	9.53064
5	10	2019	March	H	13.98	1.3	B	m	47	48.1	4.15	8.62786
5	1	2019	April	H	15.16	1.01	A	g	54	64.31	2.09	3.24988
5	2	2019	April	H	15.16	1.01	A	g	57	75.52	3.14	4.15784
5	3	2019	April	H	15.16	1.01	A	g	55	62.74	3.8	6.05674
5	4	2019	April	H	15.16	1.01	A	g	56	73.08	2.55	3.48933
5	5	2019	April	H	15.16	1.01	A	g	51	68.98	1.58	2.29052
5	6	2019	April	H	15.16	1.01	A	g	54	66.62	3.41	5.11858
5	7	2019	April	H	15.16	1.01	A	g	55	60.82	1.46	2.40053
5	8	2019	April	H	15.16	1.01	A	g	53	64.54	2.52	3.90456
5	9	2019	April	H	15.16	1.01	A	g	55	62.02	6.11	9.85166
5	10	2019	April	H	15.16	1.01	A	g	50	55.37	1.73	3.12444
5	1	2019	April	H	15.16	1.01	A	m	47	41.71	1.09	2.61328
5	2	2019	April	H	15.16	1.01	A	m	47	43.46	0.63	1.44961
5	3	2019	April	H	15.16	1.01	A	m	46	37.3	0.72	1.93029
5	4	2019	April	H	15.16	1.01	A	m	46	37.46	0.61	1.6284
5	5	2019	April	H	15.16	1.01	A	m	46	41.14	0.87	2.11473
5	6	2019	April	H	15.16	1.01	A	m	45	38.66	0.46	1.18986
5	7	2019	April	H	15.16	1.01	A	m	49	51.97	1.97	3.79065
5	8	2019	April	H	15.16	1.01	A	m	49	60.49	1.53	2.52934
5	9	2019	April	H	15.16	1.01	A	m	46	49.31	2	4.05597
5	10	2019	April	H	15.16	1.01	A	m	49	52.56	1	1.90259
5	1	2019	April	H	15.16	1.01	B	g	59	81.42	2.51	3.08278
5	2	2019	April	H	15.16	1.01	B	g	54	65.34	2.57	3.93327
5	3	2019	April	H	15.16	1.01	B	g	53	56.72	3.58	6.31171
5	4	2019	April	H	15.16	1.01	B	g	52	55.3	1.31	2.3689
5	5	2019	April	H	15.16	1.01	B	g	51	56.82	2.99	5.26223
5	6	2019	April	H	15.16	1.01	B	g	50	58.28	0.95	1.63006
5	7	2019	April	H	15.16	1.01	B	g	53	61.45	1.54	2.5061
5	8	2019	April	H	15.16	1.01	B	g	50	51.09	2.23	4.36485
5	9	2019	April	H	15.16	1.01	B	g	50	53.97	2.49	4.61367
5	10	2019	April	H	15.16	1.01	B	g	52	53.69	1.32	2.45856
5	1	2019	April	H	15.16	1.01	B	m	47	44.04	0.82	1.86194
5	2	2019	April	H	15.16	1.01	B	m	47	41.88	1.29	3.08023
5	3	2019	April	H	15.16	1.01	B	m	48	49.23	0.73	1.48284
5	4	2019	April	H	15.16	1.01	B	m	49	39.16	2.67	6.81818
5	5	2019	April	H	15.16	1.01	B	m	48	47.72	2.12	4.44258
5	6	2019	April	H	15.16	1.01	B	m	43	34.28	1.1	3.20887
5	7	2019	April	H	15.16	1.01	B	m	45	39.77	1.62	4.07342
5	8	2019	April	H	15.16	1.01	B	m	47	46.89	0.42	0.895713
5	9	2019	April	H	15.16	1.01	B	m	49	54.09	1.72	3.17989
5	10	2019	April	H	15.16	1.01	B	m	44	34.24	0.81	2.36565
5	1	2019	May	H	16.42	1.29	A	g	52	63.28	1.06	1.67509
5	2	2019	May	H	16.42	1.29	A	g	52	56.81	0.88	1.54902
5	3	2019	May	H	16.42	1.29	A	g	57	62.25	2.47	3.96787
5	4	2019	May	H	16.42	1.29	A	g	56	72.68	1.3	1.78866
5	5	2019	May	H	16.42	1.29	A	g	57	67.4	1.15	1.70623
5	6	2019	May	H	16.42	1.29	A	g	53	63.21	2.06	3.25898
5	7	2019	May	H	16.42	1.29	A	g	52	60.31	1.21	2.0063
5	8	2019	May	H	16.42	1.29	A	g	55	69.97	4.18	5.97399
5	9	2019	May	H	16.42	1.29	A	g	54	64.95	1.06	1.63202
5	10	2019	May	H	16.42	1.29	A	g	53	65.3	2.57	3.93568
5	1	2019	May	H	16.42	1.29	A	m	48	45.38	1.25	2.75452
5	2	2019	May	H	16.42	1.29	A	m	47	42.07	0.54	1.28357
5	3	2019	May	H	16.42	1.29	A	m	48	42.9	0.8	1.8648
5	4	2019	May	H	16.42	1.29	A	m	49	50.33	0.83	1.64912
5	5	2019	May	H	16.42	1.29	A	m	44	36.21	0.27	0.74565
5	6	2019	May	H	16.42	1.29	A	m	48	41.63	0.76	1.82561
5	7	2019	May	H	16.42	1.29	A	m	47	39.71	0.75	1.88869
5	8	2019	May	H	16.42	1.29	A	m	46	40.48	0.61	1.50692
5	9	2019	May	H	16.42	1.29	A	m	48	43.46	1.49	3.42844
5	10	2019	May	H	16.42	1.29	A	m	44	37.27	0.56	1.50255
5	1	2019	May	H	16.42	1.29	B	g	55	69.21	0.84	1.2137
5	2	2019	May	H	16.42	1.29	B	g	54	66.81	1.54	2.30504
5	3	2019	May	H	16.42	1.29	B	g	50	48.57	0.24	0.494132
5	4	2019	May	H	16.42	1.29	B	g	51	54.85	0.41	0.747493
5	5	2019	May	H	16.42	1.29	B	g	56	72.43	1.09	1.5049
5	6	2019	May	H	16.42	1.29	B	g	53	57.53	1.52	2.6421
5	7	2019	May	H	16.42	1.29	B	g	57	68.72	0.62	0.902212
5	8	2019	May	H	16.42	1.29	B	g	53	52.85	0.48	0.908231
5	9	2019	May	H	16.42	1.29	B	g	53	62.73	1.5	2.3912
5	10	2019	May	H	16.42	1.29	B	g	51	51.38	0.82	1.59595
5	1	2019	May	H	16.42	1.29	B	m	49	48.2	0.43	0.892116
5	2	2019	May	H	16.42	1.29	B	m	49	51.38	0.14	0.27248
5	3	2019	May	H	16.42	1.29	B	m	44	39.37	0.47	1.1938
5	4	2019	May	H	16.42	1.29	B	m	49	45.07	0.69	1.53095
5	5	2019	May	H	16.42	1.29	B	m	46	42.48	0.51	1.20056
5	6	2019	May	H	16.42	1.29	B	m	49	45.42	1.02	2.24571
5	7	2019	May	H	16.42	1.29	B	m	46	42.94	1.24	2.88775
5	8	2019	May	H	16.42	1.29	B	m	46	34.07	0.5	1.46757
5	9	2019	May	H	16.42	1.29	B	m	47	44.21	0.27	0.610722
5	10	2019	May	H	16.42	1.29	B	m	44	38.46	1.48	3.84815
5	1	2018	June	C	21.6683	0.72	A	g	56	62.61	1.11	1.77288
5	3	2018	June	C	21.6683	0.72	A	g	52	56.11	1.94	3.45749
5	5	2018	June	C	21.6683	0.72	A	g	52	61.16	1.52	2.48528
5	6	2018	June	C	21.6683	0.72	A	g	50	47.08	1.73	3.6746
5	7	2018	June	C	21.6683	0.72	A	g	56	60.38	1.18	1.95429
5	8	2018	June	C	21.6683	0.72	A	g	51	55.24	0.58	1.04996
5	9	2018	June	C	21.6683	0.72	A	g	61	80.35	2.31	2.87492
5	10	2018	June	C	21.6683	0.72	A	g	54	69.09	1.34	1.9395
5	11	2018	June	C	21.6683	0.72	A	g	53	62.91	1.46	2.32078
5	12	2018	June	C	21.6683	0.72	A	g	55	71.56	2	2.79486
5	2	2018	June	C	21.6683	0.72	A	m	48	49.8	0.62	1.24498
5	4	2018	June	C	21.6683	0.72	A	m	49	51.52	1.09	2.11568
5	2	2018	June	C	21.6683	0.72	B	g	55	70.68	1.17	1.65535
5	3	2018	June	C	21.6683	0.72	B	g	52	62.12	1.92	3.09079
5	4	2018	June	C	21.6683	0.72	B	g	51	60.28	0.97	1.60916
5	6	2018	June	C	21.6683	0.72	B	g	53	61.7	1.04	1.68558
5	9	2018	June	C	21.6683	0.72	B	g	50	43.37	0.61	1.4065
5	10	2018	June	C	21.6683	0.72	B	g	55	66.86	1.37	2.04906
5	11	2018	June	C	21.6683	0.72	B	g	54	64.49	1.03	1.59715
5	12	2018	June	C	21.6683	0.72	B	g	51	49.55	0.7	1.41271
5	1	2018	June	C	21.6683	0.72	B	m	44	39.06	0.45	1.15207
5	5	2018	June	C	21.6683	0.72	B	m	49	51.56	0.56	1.08611
5	7	2018	June	C	21.6683	0.72	B	m	45	44.45	0.52	1.16985
5	8	2018	June	C	21.6683	0.72	B	m	49	51.67	1.16	2.24502
5	1	2018	July	C	25.4281	0.62	A	g	54	63.67	2.09	3.28255
5	2	2018	July	C	25.4281	0.62	A	g	62	85.98	3.88	4.51268
5	3	2018	July	C	25.4281	0.62	A	g	61	75.05	4.48	5.96935
5	4	2018	July	C	25.4281	0.62	A	g	54	64.34	1.71	2.65776
5	5	2018	July	C	25.4281	0.62	A	g	53	60.85	2.16	3.54971
5	6	2018	July	C	25.4281	0.62	A	g	54	65.31	1.56	2.38861
5	7	2018	July	C	25.4281	0.62	A	g	58	74.52	3.18	4.26731
5	8	2018	July	C	25.4281	0.62	A	g	59	89.9	2.27	2.52503
5	10	2018	July	C	25.4281	0.62	A	g	52	57.53	2.01	3.49383
5	11	2018	July	C	25.4281	0.62	A	g	55	68.47	2.61	3.81189
5	12	2018	July	C	25.4281	0.62	A	g	59	71.66	1.75	2.44209
5	9	2018	July	C	25.4281	0.62	A	m	47	38.02	1	2.63019
5	1	2018	July	C	25.4281	0.62	B	g	51	46.63	0.97	2.08021
5	2	2018	July	C	25.4281	0.62	B	g	51	55.03	0.97	1.76267
5	3	2018	July	C	25.4281	0.62	B	g	53	58.83	1.62	2.7537
5	4	2018	July	C	25.4281	0.62	B	g	56	70.26	0.87	1.23826
5	5	2018	July	C	25.4281	0.62	B	g	52	52.44	1.12	2.13577
5	6	2018	July	C	25.4281	0.62	B	g	51	55.86	0.95	1.70068
5	7	2018	July	C	25.4281	0.62	B	g	59	80.3	1.03	1.28269
5	8	2018	July	C	25.4281	0.62	B	m	47	46.26	0.26	0.562041
5	9	2018	July	C	25.4281	0.62	B	m	46	44.29	1.46	3.29646
5	10	2018	July	C	25.4281	0.62	B	m	45	40.02	0.38	0.949525
5	11	2018	July	C	25.4281	0.62	B	m	45	39.74	1.13	2.84348
5	12	2018	July	C	25.4281	0.62	B	m	46	39.38	1.06	2.69172
5	2	2018	August	C	26.3494	0.61	A	g	50	56.83	1.28	2.25233
5	3	2018	August	C	26.3494	0.61	A	g	53	65.35	1.97	3.01454
5	4	2018	August	C	26.3494	0.61	A	g	50	57.16	1.38	2.41428
5	9	2018	August	C	26.3494	0.61	A	g	50	48.16	1.5	3.11462
5	11	2018	August	C	26.3494	0.61	A	g	53	65.83	2.86	4.34452
5	12	2018	August	C	26.3494	0.61	A	g	53	57.92	1.91	3.29765
5	1	2018	August	C	26.3494	0.61	A	m	49	56.24	1.38	2.45377
5	5	2018	August	C	26.3494	0.61	A	m	48	52.9	1.15	2.17391
5	6	2018	August	C	26.3494	0.61	A	m	49	58.09	1.56	2.68549
5	7	2018	August	C	26.3494	0.61	A	m	49	52.83	2.55	4.8268
5	8	2018	August	C	26.3494	0.61	A	m	49	54.72	2.3	4.20322
5	10	2018	August	C	26.3494	0.61	A	m	46	40.43	1.67	4.1306
5	2	2018	August	C	26.3494	0.61	B	g	59	82.55	1.76	2.13204
5	3	2018	August	C	26.3494	0.61	B	g	56	68.61	0.7	1.02026
5	4	2018	August	C	26.3494	0.61	B	g	57	74.08	1.18	1.59287
5	5	2018	August	C	26.3494	0.61	B	g	52	52.82	1.02	1.93109
5	6	2018	August	C	26.3494	0.61	B	g	54	68.88	1.44	2.09059
5	8	2018	August	C	26.3494	0.61	B	g	50	52.18	1.12	2.14642
5	9	2018	August	C	26.3494	0.61	B	g	50	50.68	1.34	2.64404
5	10	2018	August	C	26.3494	0.61	B	g	57	75.09	1.14	1.51818
5	11	2018	August	C	26.3494	0.61	B	g	50	38.6	1.33	3.4456
5	12	2018	August	C	26.3494	0.61	B	g	54	64.02	0.93	1.45267
5	1	2018	August	C	26.3494	0.61	B	m	49	51.5	1.17	2.27184
5	7	2018	August	C	26.3494	0.61	B	m	47	44.86	1.06	2.36291
5	1	2018	September	C	24.8983	0.59	A	g	55	72.02	2.73	3.79061
5	2	2018	September	C	24.8983	0.59	A	g	53	65.45	2.65	4.04889
5	4	2018	September	C	24.8983	0.59	A	g	52	67.21	3.06	4.55289
5	5	2018	September	C	24.8983	0.59	A	g	55	66.35	2.38	3.58704
5	6	2018	September	C	24.8983	0.59	A	g	56	57.13	1.84	3.22072
5	8	2018	September	C	24.8983	0.59	A	g	53	62.99	1.66	2.63534
5	9	2018	September	C	24.8983	0.59	A	g	51	64.1	2.03	3.16693
5	10	2018	September	C	24.8983	0.59	A	g	56	70.14	2.14	3.05104
5	11	2018	September	C	24.8983	0.59	A	g	50	49.27	1.9	3.8563
5	12	2018	September	C	24.8983	0.59	A	g	55	70.71	1.61	2.27691
5	3	2018	September	C	24.8983	0.59	A	m	49	49.65	1.21	2.43706
5	7	2018	September	C	24.8983	0.59	A	m	49	51.18	1.02	1.99297
5	1	2018	September	C	24.8983	0.59	B	g	51	59.93	0.32	0.533956
5	2	2018	September	C	24.8983	0.59	B	g	54	70.61	1.03	1.45872
5	3	2018	September	C	24.8983	0.59	B	g	54	62.52	0.73	1.16763
5	4	2018	September	C	24.8983	0.59	B	g	58	89.91	1.13	1.25681
5	5	2018	September	C	24.8983	0.59	B	g	55	69.18	1.29	1.8647
5	6	2018	September	C	24.8983	0.59	B	g	50	59.88	0.09	0.150301
5	7	2018	September	C	24.8983	0.59	B	g	52	52.86	0.78	1.4756
5	8	2018	September	C	24.8983	0.59	B	g	50	48.86	0.53	1.08473
5	9	2018	September	C	24.8983	0.59	B	g	52	54.04	0.64	1.18431
5	10	2018	September	C	24.8983	0.59	B	g	50	59.31	0.17	0.28663
5	12	2018	September	C	24.8983	0.59	B	g	54	68.72	1.31	1.90629
5	11	2018	September	C	24.8983	0.59	B	m	48	42.36	0.4	0.944287
5	1	2018	October	C	21.9971	1.01	A	g	57	75.77	2.39	3.15428
5	2	2018	October	C	21.9971	1.01	A	g	60	85.34	3.56	4.17155
5	3	2018	October	C	21.9971	1.01	A	g	57	60.84	2.9	4.7666
5	4	2018	October	C	21.9971	1.01	A	g	67	113.54	4.18	3.68152
5	5	2018	October	C	21.9971	1.01	A	g	55	73.91	2.3	3.11189
5	6	2018	October	C	21.9971	1.01	A	g	53	61.34	0.75	1.22269
5	8	2018	October	C	21.9971	1.01	A	g	53	48.48	2.4	4.9505
5	9	2018	October	C	21.9971	1.01	A	g	52	63.27	2.1	3.31911
5	10	2018	October	C	21.9971	1.01	A	g	58	80.9	1.55	1.91595
5	7	2018	October	C	21.9971	1.01	A	m	49	54.91	0.72	1.31124
5	11	2018	October	C	21.9971	1.01	A	m	48	55.94	1.6	2.86021
5	12	2018	October	C	21.9971	1.01	A	m	45	40.96	0.3	0.732422
5	1	2018	October	C	21.9971	1.01	B	g	50	54.41	0.39	0.71678
5	2	2018	October	C	21.9971	1.01	B	g	59	79.45	1.16	1.46004
5	3	2018	October	C	21.9971	1.01	B	g	54	65.21	1.92	2.94433
5	4	2018	October	C	21.9971	1.01	B	g	53	55.19	0.89	1.61261
5	5	2018	October	C	21.9971	1.01	B	g	53	62.96	1.32	2.09657
5	7	2018	October	C	21.9971	1.01	B	g	51	31.29	0.19	0.607223
5	8	2018	October	C	21.9971	1.01	B	g	52	40.54	1.72	4.24272
5	12	2018	October	C	21.9971	1.01	B	g	52	67.53	1.71	2.53221
5	6	2018	October	C	21.9971	1.01	B	m	49	50.48	0.31	0.614105
5	9	2018	October	C	21.9971	1.01	B	m	46	37.49	0.47	1.25367
5	10	2018	October	C	21.9971	1.01	B	m	46	42.73	0.7	1.63819
5	11	2018	October	C	21.9971	1.01	B	m	48	45.42	0.61	1.34302
5	1	2018	December	C	15.2865	1.39	A	g	54	63.69	6.43	10.0958
5	2	2018	December	C	15.2865	1.39	A	g	50	49.84	1.89	3.79213
5	3	2018	December	C	15.2865	1.39	A	g	59	66.87	3.53	5.2789
5	4	2018	December	C	15.2865	1.39	A	g	52	55.89	1.52	2.71963
5	5	2018	December	C	15.2865	1.39	A	m	49	58.34	2.18	3.73672
5	6	2018	December	C	15.2865	1.39	A	m	49	50.19	2.5	4.98107
5	7	2018	December	C	15.2865	1.39	A	m	47	50.04	1.01	2.01839
5	8	2018	December	C	15.2865	1.39	A	m	44	37.19	2.53	6.8029
5	9	2018	December	C	15.2865	1.39	A	m	35	17.61	1.13	6.41681
5	10	2018	December	C	15.2865	1.39	A	m	42	32.39	2.06	6.35999
5	11	2018	December	C	15.2865	1.39	A	m	42	29.31	2.56	8.73422
5	12	2018	December	C	15.2865	1.39	A	m	41	30.04	1.39	4.62716
5	13	2018	December	C	15.2865	1.39	A	m	36	20.43	0.01	0.0489476
5	14	2018	December	C	15.2865	1.39	A	m	39	24.8	0.84	3.3871
5	15	2018	December	C	15.2865	1.39	A	m	39	26.63	1.2	4.5062
5	1	2018	December	C	15.2865	1.39	B	g	61	88.72	4.36	4.91434
5	2	2018	December	C	15.2865	1.39	B	g	51	49.48	1.52	3.07195
5	3	2018	December	C	15.2865	1.39	B	g	57	88.25	0.95	1.07649
5	4	2018	December	C	15.2865	1.39	B	g	50	55.97	2.15	3.84134
5	5	2018	December	C	15.2865	1.39	B	m	48	53.73	1.56	2.90341
5	6	2018	December	C	15.2865	1.39	B	m	48	43.54	1.4	3.21543
5	7	2018	December	C	15.2865	1.39	B	m	47	38.14	1.39	3.64447
5	8	2018	December	C	15.2865	1.39	B	m	47	43.64	1.34	3.07058
5	9	2018	December	C	15.2865	1.39	B	m	40	25.79	1	3.87747
5	10	2018	December	C	15.2865	1.39	B	m	38	20.54	1.28	6.23174
5	11	2018	December	C	15.2865	1.39	B	m	45	34.9	1.42	4.06877
5	12	2018	December	C	15.2865	1.39	B	m	38	21.82	1.27	5.82035
5	13	2018	December	C	15.2865	1.39	B	m	41	18.15	0.99	5.45455
5	14	2018	December	C	15.2865	1.39	B	m	47	41.1	1.74	4.23358
5	15	2018	December	C	15.2865	1.39	B	m	48	44.34	1.58	3.56337
5	1	2019	February	C	13.6004	1.12	A	g	64	108.44	3.52	3.24603
5	2	2019	February	C	13.6004	1.12	A	g	58	88.26	4.42	5.00793
5	3	2019	February	C	13.6004	1.12	A	g	58	89.6	10.32	11.5179
5	4	2019	February	C	13.6004	1.12	A	g	58	89.55	4.81	5.3713
5	5	2019	February	C	13.6004	1.12	A	g	53	100.89	6.23	6.17504
5	6	2019	February	C	13.6004	1.12	A	g	55	69.52	3.81	5.48044
5	7	2019	February	C	13.6004	1.12	A	g	62	106.41	6.18	5.80772
5	8	2019	February	C	13.6004	1.12	A	g	54	67.5	5.24	7.76296
5	9	2019	February	C	13.6004	1.12	A	g	54	69.47	2.9	4.17446
5	10	2019	February	C	13.6004	1.12	A	g	56	75.17	5.3	7.05069
5	1	2019	February	C	13.6004	1.12	A	m	49	57.14	3.2	5.60028
5	2	2019	February	C	13.6004	1.12	A	m	43	34.63	0.57	1.64597
5	3	2019	February	C	13.6004	1.12	A	m	45	40.06	1.57	3.91912
5	4	2019	February	C	13.6004	1.12	A	m	46	48.47	2.71	5.59109
5	5	2019	February	C	13.6004	1.12	A	m	44	39.93	1.78	4.4578
5	6	2019	February	C	13.6004	1.12	A	m	47	47.29	1.72	3.63713
5	7	2019	February	C	13.6004	1.12	A	m	49	50.56	1.49	2.94699
5	8	2019	February	C	13.6004	1.12	A	m	46	39.07	0.28	0.716662
5	9	2019	February	C	13.6004	1.12	A	m	49	54.4	3.54	6.50735
5	10	2019	February	C	13.6004	1.12	A	m	45	38.75	2.04	5.26452
5	1	2019	February	C	13.6004	1.12	B	g	51	52.97	1.93	3.64357
5	2	2019	February	C	13.6004	1.12	B	g	50	58.62	3.05	5.203
5	3	2019	February	C	13.6004	1.12	B	g	53	60.77	2.48	4.08096
5	4	2019	February	C	13.6004	1.12	B	g	53	65.75	2.65	4.03042
5	5	2019	February	C	13.6004	1.12	B	g	53	55.29	3.02	5.46211
5	6	2019	February	C	13.6004	1.12	B	g	53	64.33	2.57	3.99503
5	7	2019	February	C	13.6004	1.12	B	g	55	74.43	0.15	0.201532
5	8	2019	February	C	13.6004	1.12	B	g	54	70.54	6.52	9.24298
5	9	2019	February	C	13.6004	1.12	B	g	51	58.07	1.18	2.03203
5	1	2019	February	C	13.6004	1.12	B	m	47	42.61	2.35	5.51514
5	2	2019	February	C	13.6004	1.12	B	m	49	55.41	2.63	4.74644
5	3	2019	February	C	13.6004	1.12	B	m	47	59.02	1.6	2.71095
5	4	2019	February	C	13.6004	1.12	B	m	43	37.24	2.15	5.77336
5	5	2019	February	C	13.6004	1.12	B	m	45	38.73	2	5.16396
5	6	2019	February	C	13.6004	1.12	B	m	48	47.33	0.68	1.43672
5	7	2019	February	C	13.6004	1.12	B	m	47	47.57	2.12	4.45659
5	8	2019	February	C	13.6004	1.12	B	m	49	48.88	4.37	8.94026
5	9	2019	February	C	13.6004	1.12	B	m	49	48.93	1.92	3.92397
5	10	2019	February	C	13.6004	1.12	B	m	49	55.21	3.54	6.41188
5	11	2019	February	C	13.6004	1.12	B	m	49	47.25	1.01	2.13757
5	1	2019	March	C	14.019	1.3	A	g	51	58.43	5.57	9.53277
5	2	2019	March	C	14.019	1.3	A	g	56	73.57	4.84	6.57877
5	3	2019	March	C	14.019	1.3	A	g	59	81.09	7.31	9.01468
5	4	2019	March	C	14.019	1.3	A	g	53	68.42	4.32	6.31394
5	5	2019	March	C	14.019	1.3	A	g	53	58.89	4.28	7.26779
5	6	2019	March	C	14.019	1.3	A	g	55	78.21	4.29	5.48523
5	7	2019	March	C	14.019	1.3	A	g	58	82.13	4.34	5.28431
5	8	2019	March	C	14.019	1.3	A	g	55	65.8	3.54	5.37994
5	9	2019	March	C	14.019	1.3	A	g	54	69.22	7.68	11.0951
5	10	2019	March	C	14.019	1.3	A	g	53	67.43	4.54	6.73291
5	1	2019	March	C	14.019	1.3	A	m	44	34.74	2.09	6.01612
5	2	2019	March	C	14.019	1.3	A	m	42	30.1	1.41	4.68439
5	3	2019	March	C	14.019	1.3	A	m	46	45.71	2.55	5.57865
5	4	2019	March	C	14.019	1.3	A	m	49	48.24	2.79	5.78358
5	5	2019	March	C	14.019	1.3	A	m	40	33.03	1.55	4.6927
5	6	2019	March	C	14.019	1.3	A	m	45	43.8	1.73	3.94977
5	7	2019	March	C	14.019	1.3	A	m	44	44.46	2.51	5.64552
5	8	2019	March	C	14.019	1.3	A	m	40	24.9	0.39	1.56627
5	9	2019	March	C	14.019	1.3	A	m	43	33.39	1.7	5.09134
5	10	2019	March	C	14.019	1.3	A	m	43	35.13	0.2	0.569314
5	1	2019	March	C	14.019	1.3	B	g	52	56.58	3.93	6.94592
5	2	2019	March	C	14.019	1.3	B	g	54	66.04	5.23	7.91944
5	3	2019	March	C	14.019	1.3	B	g	62	78.67	4.73	6.01246
5	4	2019	March	C	14.019	1.3	B	g	53	66.22	5.21	7.86771
5	5	2019	March	C	14.019	1.3	B	g	53	65.84	1.51	2.29344
5	6	2019	March	C	14.019	1.3	B	g	52	62.45	1.74	2.78623
5	7	2019	March	C	14.019	1.3	B	g	54	73.36	4.1	5.58888
5	8	2019	March	C	14.019	1.3	B	g	50	55.07	3.1	5.6292
5	9	2019	March	C	14.019	1.3	B	g	51	55.59	3.18	5.72045
5	10	2019	March	C	14.019	1.3	B	g	50	53.73	1.41	2.62423
5	1	2019	March	C	14.019	1.3	B	m	45	33.52	2.14	6.38425
5	2	2019	March	C	14.019	1.3	B	m	46	45.05	3.9	8.65705
5	3	2019	March	C	14.019	1.3	B	m	40	28.89	1.76	6.09207
5	4	2019	March	C	14.019	1.3	B	m	46	39.89	2.62	6.56806
5	5	2019	March	C	14.019	1.3	B	m	40	30.75	2.3	7.47967
5	6	2019	March	C	14.019	1.3	B	m	41	36.51	1.41	3.86196
5	7	2019	March	C	14.019	1.3	B	m	45	39.86	1.95	4.89212
5	8	2019	March	C	14.019	1.3	B	m	48	49.87	3.5	7.01825
5	9	2019	March	C	14.019	1.3	B	m	44	32.36	2.66	8.22002
5	10	2019	March	C	14.019	1.3	B	m	42	36.55	1.08	2.95486
5	1	2019	April	C	15.1977	1.01	A	g	62	107.69	5.18	4.8101
5	2	2019	April	C	15.1977	1.01	A	g	62	89.92	7.55	8.39635
5	3	2019	April	C	15.1977	1.01	A	g	66	122.87	7.43	6.04704
5	4	2019	April	C	15.1977	1.01	A	g	52	58.45	2.92	4.99572
5	5	2019	April	C	15.1977	1.01	A	g	58	78.78	4.11	5.21706
5	6	2019	April	C	15.1977	1.01	A	g	55	69.76	3.73	5.3469
5	7	2019	April	C	15.1977	1.01	A	g	55	64.52	1.79	2.77433
5	8	2019	April	C	15.1977	1.01	A	g	50	49.27	1.53	3.10534
5	9	2019	April	C	15.1977	1.01	A	g	50	58.17	1.41	2.42393
5	10	2019	April	C	15.1977	1.01	A	g	51	49.68	3.52	7.08535
5	1	2019	April	C	15.1977	1.01	A	m	49	48.51	5.34	11.008
5	2	2019	April	C	15.1977	1.01	A	m	48	44.94	2.11	4.69515
5	3	2019	April	C	15.1977	1.01	A	m	48	43.86	1.54	3.51117
5	4	2019	April	C	15.1977	1.01	A	m	47	43.05	3.38	7.85134
5	5	2019	April	C	15.1977	1.01	A	m	48	49.47	3.26	6.58985
5	6	2019	April	C	15.1977	1.01	A	m	46	43.26	0.96	2.21914
5	7	2019	April	C	15.1977	1.01	A	m	48	47.27	2.05	4.33679
5	8	2019	April	C	15.1977	1.01	A	m	45	40.33	1.98	4.9095
5	9	2019	April	C	15.1977	1.01	A	m	46	39.51	0.79	1.99949
5	10	2019	April	C	15.1977	1.01	A	m	48	44.23	1.43	3.2331
5	1	2019	April	C	15.1977	1.01	B	g	52	67.62	2.22	3.28305
5	2	2019	April	C	15.1977	1.01	B	g	60	77.74	3.5	4.50219
5	3	2019	April	C	15.1977	1.01	B	g	54	61.37	2.55	4.15512
5	4	2019	April	C	15.1977	1.01	B	g	52	63.63	4.24	6.66352
5	5	2019	April	C	15.1977	1.01	B	g	52	55.12	4.93	8.94412
5	6	2019	April	C	15.1977	1.01	B	g	55	63.91	3.95	6.18057
5	7	2019	April	C	15.1977	1.01	B	g	50	51.11	4.01	7.84582
5	8	2019	April	C	15.1977	1.01	B	g	52	54.5	9.1	16.6972
5	9	2019	April	C	15.1977	1.01	B	g	51	51.71	1.17	2.26262
5	10	2019	April	C	15.1977	1.01	B	g	50	56.2	3.16	5.62278
5	1	2019	April	C	15.1977	1.01	B	m	48	34.86	4.15	11.9048
5	2	2019	April	C	15.1977	1.01	B	m	49	35.48	2.44	6.87711
5	3	2019	April	C	15.1977	1.01	B	m	46	35.24	1.84	5.22134
5	4	2019	April	C	15.1977	1.01	B	m	45	30.08	2.2	7.31383
5	5	2019	April	C	15.1977	1.01	B	m	44	37.11	1.96	5.2816
5	6	2019	April	C	15.1977	1.01	B	m	45	42.88	3.06	7.13619
5	7	2019	April	C	15.1977	1.01	B	m	48	45.68	1.48	3.23993
5	8	2019	April	C	15.1977	1.01	B	m	44	37.29	2.2	5.89971
5	9	2019	April	C	15.1977	1.01	B	m	43	28.88	0.62	2.14681
5	10	2019	April	C	15.1977	1.01	B	m	41	29.65	0.86	2.90051
5	1	2019	May	C	16.5071	1.29	A	g	54	72.92	2.02	2.77016
5	2	2019	May	C	16.5071	1.29	A	g	52	54.43	1.59	2.92118
5	3	2019	May	C	16.5071	1.29	A	g	56	70.97	1.67	2.35311
5	4	2019	May	C	16.5071	1.29	A	g	57	85.28	1.13	1.32505
5	5	2019	May	C	16.5071	1.29	A	g	55	62.89	0.92	1.46287
5	6	2019	May	C	16.5071	1.29	A	g	61	90.08	1.4	1.55417
5	7	2019	May	C	16.5071	1.29	A	g	54	61.48	1.07	1.7404
5	8	2019	May	C	16.5071	1.29	A	g	55	70.27	1.66	2.36232
5	9	2019	May	C	16.5071	1.29	A	g	52	53.29	0.82	1.53875
5	10	2019	May	C	16.5071	1.29	A	g	53	69.93	0.95	1.3585
5	1	2019	May	C	16.5071	1.29	A	m	48	51.88	0.53	1.02159
5	2	2019	May	C	16.5071	1.29	A	m	47	51.12	0.53	1.03678
5	3	2019	May	C	16.5071	1.29	A	m	44	33.96	0.4	1.17786
5	4	2019	May	C	16.5071	1.29	A	m	44	30.7	0.3	0.977199
5	5	2019	May	C	16.5071	1.29	A	m	42	27.96	0.24	0.858369
5	6	2019	May	C	16.5071	1.29	A	m	49	51.73	0.48	0.927895
5	7	2019	May	C	16.5071	1.29	A	m	48	43.76	0.49	1.11974
5	8	2019	May	C	16.5071	1.29	A	m	47	42.01	0.78	1.8567
5	9	2019	May	C	16.5071	1.29	A	m	48	43.07	0.58	1.34664
5	10	2019	May	C	16.5071	1.29	A	m	49	48.38	0.29	0.599421
5	1	2019	May	C	16.5071	1.29	B	g	57	78.97	1.81	2.29201
5	2	2019	May	C	16.5071	1.29	B	g	57	78.34	2.31	2.94869
5	3	2019	May	C	16.5071	1.29	B	g	57	79.84	2.18	2.73046
5	4	2019	May	C	16.5071	1.29	B	g	52	63.74	1.82	2.85535
5	5	2019	May	C	16.5071	1.29	B	g	50	54.37	1.19	2.18871
5	6	2019	May	C	16.5071	1.29	B	g	57	78.36	2.99	3.81572
5	7	2019	May	C	16.5071	1.29	B	g	51	57.78	0.55	0.951886
5	8	2019	May	C	16.5071	1.29	B	g	52	61.43	2.48	4.03712
5	9	2019	May	C	16.5071	1.29	B	g	50	51.69	0.67	1.29619
5	10	2019	May	C	16.5071	1.29	B	g	55	60.05	0.59	0.982515
5	1	2019	May	C	16.5071	1.29	B	m	48	47.57	0.78	1.63969
5	2	2019	May	C	16.5071	1.29	B	m	48	43.46	0.95	2.18592
5	3	2019	May	C	16.5071	1.29	B	m	49	44.71	0.67	1.49855
5	4	2019	May	C	16.5071	1.29	B	m	46	40.23	0.89	2.21228
5	5	2019	May	C	16.5071	1.29	B	m	49	50.93	1.07	2.10092
[truncated: 5 more rows]

## Sheet: sea urchin 2014
Locality H-site A-transept 1 (TD mm)								Locality H-site A-transept 2 (TD mm)								Locality H-site B-transept 1 (TD mm)								Locality H-site B-transept 2 (TD mm)
<1	1<Ø<2	2<Ø<3	3<Ø<4	4<Ø<5	5<Ø>6	Ø>6		<1	1<Ø<2	2<Ø<3	3<Ø<4	4<Ø<5	5<Ø>6	Ø>6		<1	1<Ø<2	2<Ø<3	3<Ø<4	4<Ø<5	5<Ø>6	Ø>6		<1	1<Ø<2	2<Ø<3	3<Ø<4	4<Ø<5	5<Ø>6	Ø>6
0.8	19	26	37	42	51	NA		0.8	17	25	37	43	56	NA		1	17	24	31	47	53	NA		0.8	19	28	34	48	54	NA
0.9	19	20	39	47	53			0.9	18	29	32	49	52				18	26	33	46	52			5	18	26	37	41	55
0.9	19	26	38	40	54			0.9	17	29	36	41	50				16	27	37	40	51				16	28	38	46	52
0.9	12	24	37	48	55			0.9	13	28	36	49	50				14	27	35	42	53				13	27	39	49	56
0.8	11	29	37	46	55			11	16	28	37	43	50				14	24	38	47	50				13	25	35	49	51
0.9	13	23	38	44	51				14	24	35	41	56				19	28	31	42	54				18	25	36	48	51
0.9	10	27	35	48	50				13	23	39	44	51				15	29	37	40	52				10	20	34	45	52
0.9	15	24	33	45	50				10	25	36	45						24	37	47	50				19	22	35	44	52
0.8	10	22	36	47					15	20	39	48						22	32	40	54				13	23	39	45	50
9	18	22	38	41					11	23	36	42						23	39	42	50				11	21	32	45	51
	12	22	37	47					12	22	33	43						23	33	40					10	22	36	48	52
	11	24	30	43					12	22	34	45						24	39	43					14	20	33	43	51
	15	28	31	41					11	20	33	43						26	37	46					18	25	31	45	51
	18	29	31	43					10	21	34	40						25	30	49					19	27	33	43	52
	12	26	32	43					19	20	31	41						28	39	47					11	23	33	40	51
	36	22	39	40					12	20	36	48						29	31	40						24	35	42	56
		29	30	45					16	20	35	41						26	31	45						23	30	44	50
		29	34	43					19	27	36	45						23	34	43						25	33	47	50
		22	30	49					16	26	36	46						25	37	42						20	36	48	50
		24	31	41					18	29	33	43						22	37	45						27	33	47	57
		24	33	42					17	29	34	45						26	37	49						22	35	45	51
		24	33	47					16	28	31	45						25	31	45						20	30	43	51
		28	39	46					12	29	33	40						24	31	47						20	39	46	50
		22	35	43					14	25	33	40						26	30	42						25	39	43	50
		24	37	43					12	20	30	41						25	33	45						24	39	41	55
		24	39	45					11	25	39	47						25	38	49						26	36	42	52
		25	36	40					13	26	34	44						23	39	49						24	31	40	50
		26	39	49					10	26	34	41						23	37	45						29	39	42	52
		22	31	40					5	21	32	44						25	35	45						22	31	49	53
		26	30	40						20	36	42						26	31	42						24	33	44	50
		25	32	45						29	35	49						21	36	40						20	33	44
		29	33	48						28	34	46						25	33	47							39	40
		20	33	43						22	31	47						22	31	47							38	47
		27	34	44						29	36	41						27	32	41							35	48
		29	30	42						20	37	46						12	31	44							39	46
		23	33	45						27	30	47						8	35	49							30	49
		29	32	43						24	35	43							38	40							37	43
		24	30	44						23	33	44							32	42							32	45
		27	30	40						20	34	40							34	49							39	40
		22	32	46						25	35	45							32	49							30	48
		23	30	47						25	34	44							34	45							32	41
		26	33	44						20	39	42							38	45							33	41
		24	35	45						28	35	46							35	44							39	47
		14	39	46						22	39	43							37	40							38	43
			39	40							33	40							31	48							36	44
			39	45							36								34	47							37	41
			37	47							35								30	48							39	46
			39	43							36								39	44							35	44
			37	42							30								34	48							33	44
			35	41							34								38	46							33	44
			32	45							31								32	42							30	44
			37	46							32								39	46							36	40
			37	42							31								38	41							36	41
			37	44							32								34	47							30	40
			38	47							33								39	44								47
			33	46							31								33	45								41
			36	49							36								37	44								42
			38	46							37								35	48								40
			31	42							30								32	45								45
			39	42							32								39	40								49
			30	42							35								34	44								42
			30	41							31								30	40								42
			33	43							30								30	45								42
			39	45							39								30	40								49
			35	47							32								38	49								48
			34	41							31								35	41								49
			9	43															33	46								45
			14	46															35	48								42
																			37	44								41
																			30	45								40
																			32	40								44
																			32	40								44
																			7	48
																			8	40
																				46
																				41
																				42
																				42
																				40
																				44
																				41
																				40

## Sheet: sea urchin 2019
date	Locality	sito	lat. N	long. E	stazione	substrate	depth	replicate	Paracentrtus lividus individuals (diameter size)
28.10.2019	H	1	40° 02'57"	8°25'49"	1	rock	2	1	49	36	42	52	42	49	36	47	40	23	50	49	47	40	52	45	49	46	39	22	25	16	42	19	54	48	48	45	37	58	40	51	49	43	30	41	18	52	42	46	43
28.10.2019	H	1	40° 02'57"	8°25'49"	1	rock	2	2	46	31	48	38	36	40	40	20	47	50	46	47	48	46	42	51	14	23	14	17	17	16	22	44	26	16	14	18	26	20
28.10.2019	H	1	40° 02'57"	8°25'49"	1	rock	2	3	9	36	18	45	41	39	48	40	23	23	37	42	42	40	48	43	47	53	18	50	22	20	11	22	18	15	22	20	20	19	18	18	22	16	18	22	18	18	21	18	17
28.10.2019	H	2	40° 02'55"	8°25'21"	1	rock	5	1	50	56	45	59	39	32
28.10.2019	H	2	40° 02'55"	8°25'21"	1	rock	5	2	53	56	44	53	34	58	55	40	31	37	30	31	32	39	29
28.10.2019	H	2	40° 02'55"	8°25'21"	1	rock	5	3	49	44	51	47	47	45	38	28	33	35	42	43	52	47	39	32	24	23	25	29	15	15	18	30	25	14
28.10.2019	H	3	40° 03'09"	8°24'19"	2	rock	2	1	51	50	45	16	51	41	31	29
28.10.2019	H	3	40° 03'09"	8°24'19"	2	rock	2	2	50	43	25	49	30	40	52	34	24	18	29
28.10.2019	H	3	40° 03'09"	8°24'19"	2	rock	2	3	36	50	18	39	40	44	54	35	51	37	48	47	46	44
28.10.2019	H	4	40° 03'02"	8°24'37"	2	rock	5	1	42	49	44	42	50	43	23	47	40	45	49	21	15	44	19	23	33	30	47	14	26	48	39	8	50	17	22	18	18	17	47	22	31	20	23	13	17	15	9	39	49
28.10.2019	H	4	40° 03'02"	8°24'37"	2	rock	5	2	9	17	42	23	48	17	46	16	28	11	18	25	41	18	32	16	35	24	45	26	15	15	25	19	19	38	48	42	14	40	21	14	17	22	30	12	18	21	18	16	15
28.10.2019	H	4	40° 03'02"	8°24'37"	2	rock	5	3	50	50	38	43	47	31	46	20	17	17	20	18	31	15	25	19	19	18	15	17	16	18	14	13	29	16	19	18	11	18	13	15	16	19	17	15	11	20	17	18	16
	sito	Site	rep
30.09.2018	H	1	1	54	55	19	15	55	28	22	34	20	27	36	50	51	43	52	12	25	26	38	49	43	49	22	18	24	52	43	52	46	39	33	37	43	20	30
30.09.2018	H	1	2	52	49	52	32	49	50	44	46	36	49	55	17	20
30.09.2018	H	1	3	49	41	37	53	48	61	25	29	48	28	24	35	29	43	50	33	46	51	54	45	56	32	34	39	37	47	55	25	36	43	53	39	47	38	48	32	22	34	25	35
08.03.2019	C	2	1	48	45	42	49	33	48	41	33	32	35	53	45	28	8	10	19	38	54	51	50	13
08.03.2019	C	2	2	51	49	42	40	29	34	61	11	12	19
08.03.2019	C	2	3	55	57	61	45	54	25	54	55	56	51	46	28	26	30
[truncated: 15 more columns]
